# Supplementary material for: Tetranuclear rollover cyclometalated organoplatinum–rhenium compounds; C–I oxidative addition and C–C reductive elimination using a rollover cycloplatinated dimer
Source: Royal Society of Chemistry journal article supplement (doi:10.1039/d1dt02086b), 2021-01-01
Supplement: d1dt02086b1.pdf [file d1dt02086b1.pdf]

## Supporting Information

**Tetranuclear Rollover Cyclometalated Organoplatinum-Rhenium Compound;**

**C-I Oxidative Addition and C-C Reductive Elimination Using a Rollover**

**Cycloplatinated Dimer**

S. Masoud Nabavizadeh<sup>a\*</sup>, Hajar Molaee<sup>a</sup>, Elahe Haddadi<sup>a</sup>, Fatemeh Niroomand Hosseini<sup>b\*</sup>, S.

Jafar Hoseini<sup>a</sup> and Mahdi M. Abu-Omar<sup>c\*</sup>

*<sup>a</sup>Professor Rashidi Laboratory of Organometallic Chemistry, Department of Chemistry, College of Sciences, Shiraz University, Shiraz 71467-13565, Iran*

*<sup>b</sup>Department of Chemistry, Shiraz Branch, Islamic Azad University, Shiraz 71993-37635, Iran*

*<sup>c</sup>Department of Chemistry and Biochemistry, University of California, Santa Barbara, California 93106, United States*

| <b>Contents</b>                                                                                                      | <b>Page</b> |
|----------------------------------------------------------------------------------------------------------------------|-------------|
| <b>Figure S1.</b> <sup>1</sup> H NMR spectrum (400 MHz) of complex <b>1</b> in CDCl <sub>3</sub> .                   | S3          |
| <b>Figure S2.</b> <sup>1</sup> H NMR spectrum (400 MHz) of complex <b>2</b> in CDCl <sub>3</sub> .                   | S3          |
| <b>Figure S3.</b> <sup>31</sup> P NMR spectrum of complex <b>2</b> in CDCl <sub>3</sub> .                            | S4          |
| <b>Figure S4.</b> <sup>13</sup> C NMR spectrum of complex <b>2</b> in CDCl <sub>3</sub> .                            | S4          |
| <b>Figure S5.</b> <sup>1</sup> H NMR spectrum (400 MHz) of complex <b>3</b> in CDCl <sub>3</sub> .                   | S5          |
| <b>Figure S6.</b> <sup>31</sup> P NMR spectrum of complex <b>3</b> in CDCl <sub>3</sub> .                            | S5          |
| <b>Figure S7.</b> <sup>13</sup> C NMR spectrum of complex <b>3</b> in CDCl <sub>3</sub> .                            | S6          |
| <b>Figure S8.</b> <sup>1</sup> H NMR spectrum (400 MHz) of complex <b>4</b> in CDCl <sub>3</sub> .                   | S6          |
| <b>Figure S9.</b> <sup>31</sup> P NMR spectrum of complex <b>4</b> in CDCl <sub>3</sub> .                            | S7          |
| <b>Table S1.</b> Crystal Data and Structure Refinement for <b>5</b> .Hexane                                          | S8          |
| Espenson's Approach for determination of higher and lower rate constants                                             | S9          |
| <b>Table S2.</b> Rate Constants ( $k_2$ and $k'_2$ ) and Calculated $\epsilon_A$ Values at 375 nm for Cases I and II | S10         |
| XYZ Cartesian coordinates of optimized structures                                                                    | S10         |

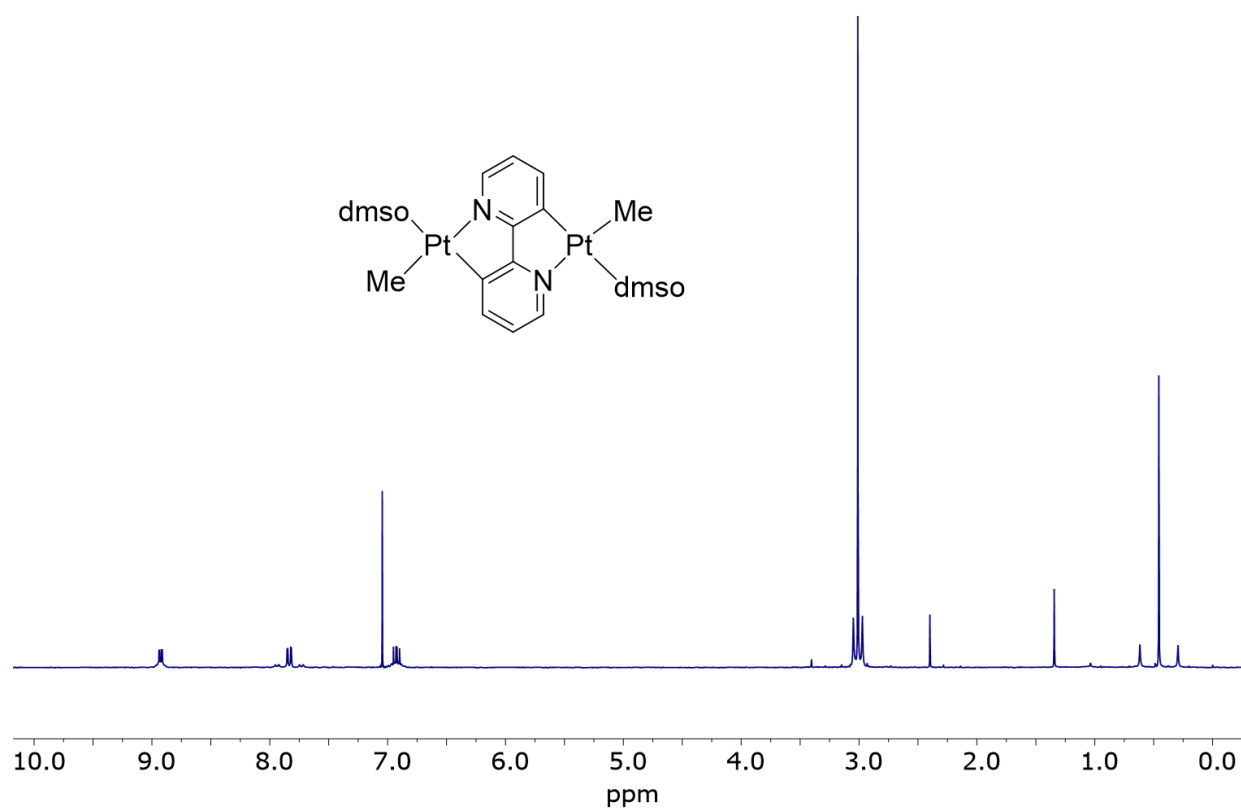

**Figure S1.**  $^1\text{H}$  NMR spectrum (400 MHz) of complex **1** in  $\text{CDCl}_3$ .

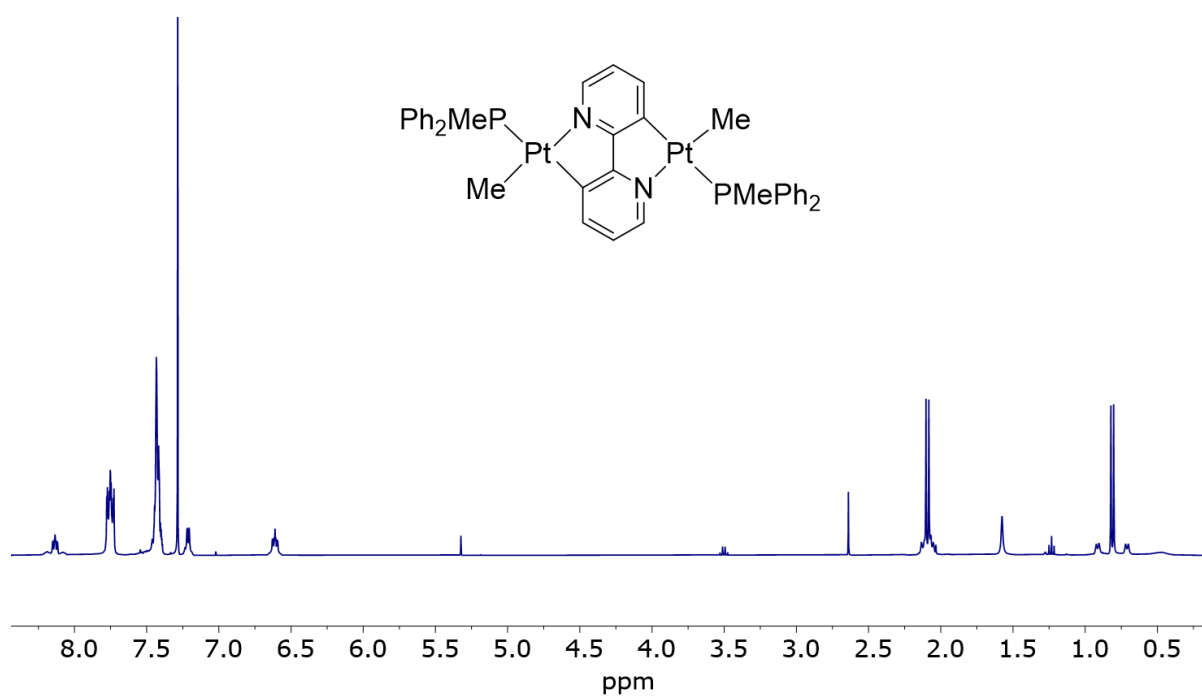

**Figure S2.**  $^1\text{H}$  NMR spectrum (400 MHz) of complex **2** in  $\text{CDCl}_3$ .

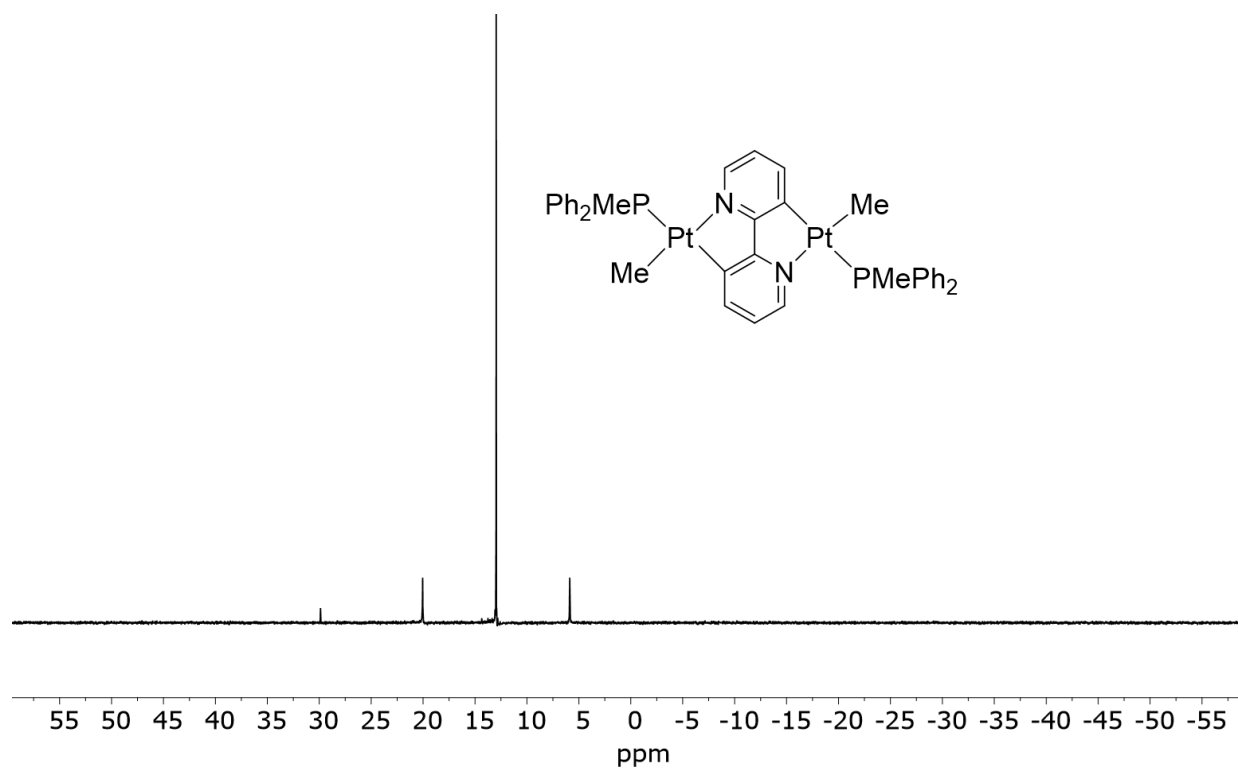

**Figure S3.**  $^{31}\text{P}$  NMR spectrum of complex **2** in  $\text{CDCl}_3$ .

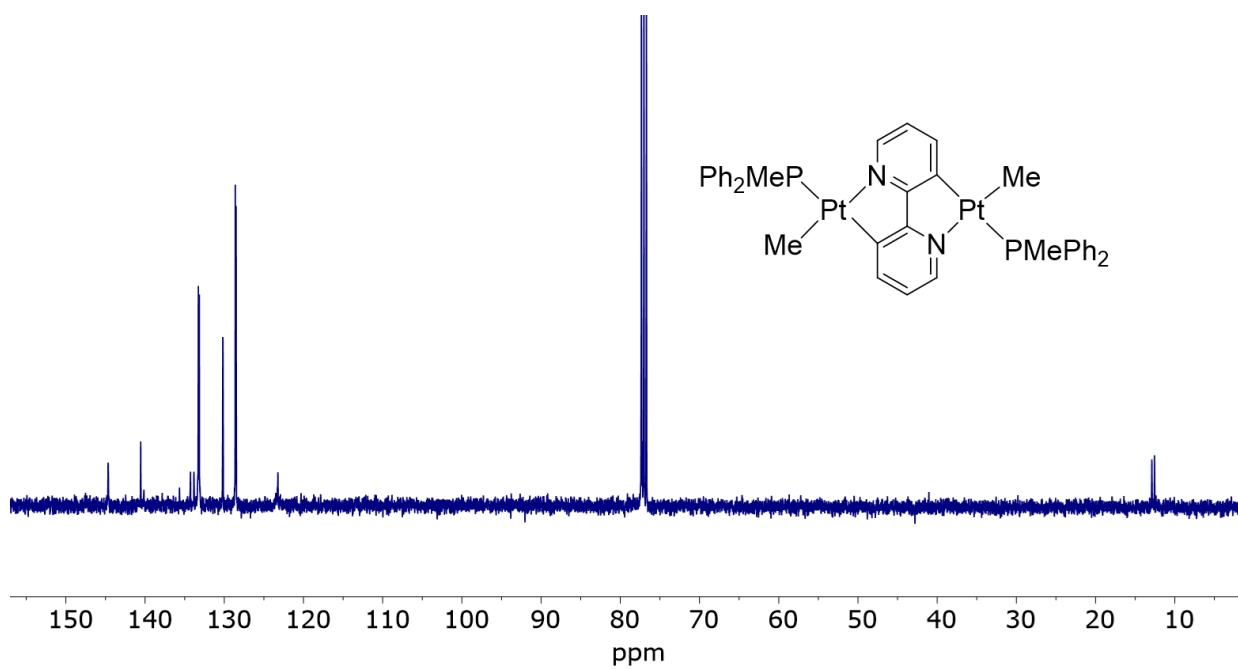

**Figure S4.**  $^{13}\text{C}$  NMR spectrum of complex **2** in  $\text{CDCl}_3$ .

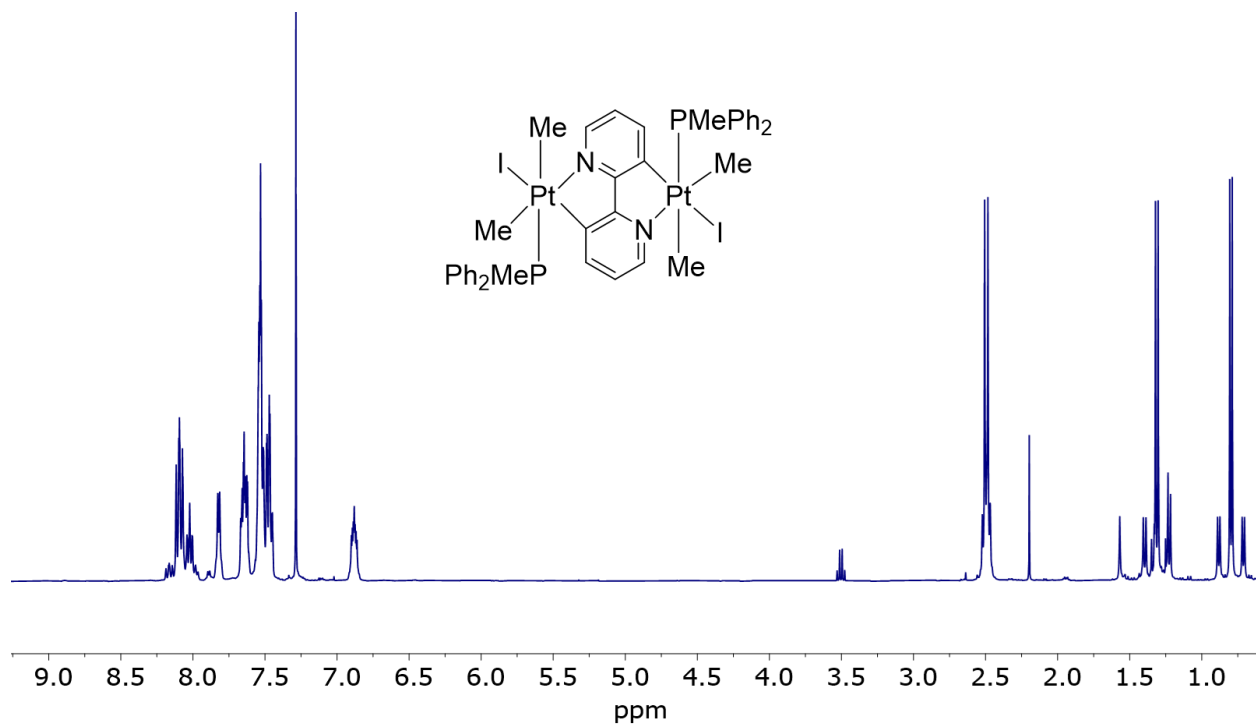

**Figure S5.**  $^1\text{H}$  NMR spectrum (400 MHz) of complex **3** in  $\text{CDCl}_3$ .

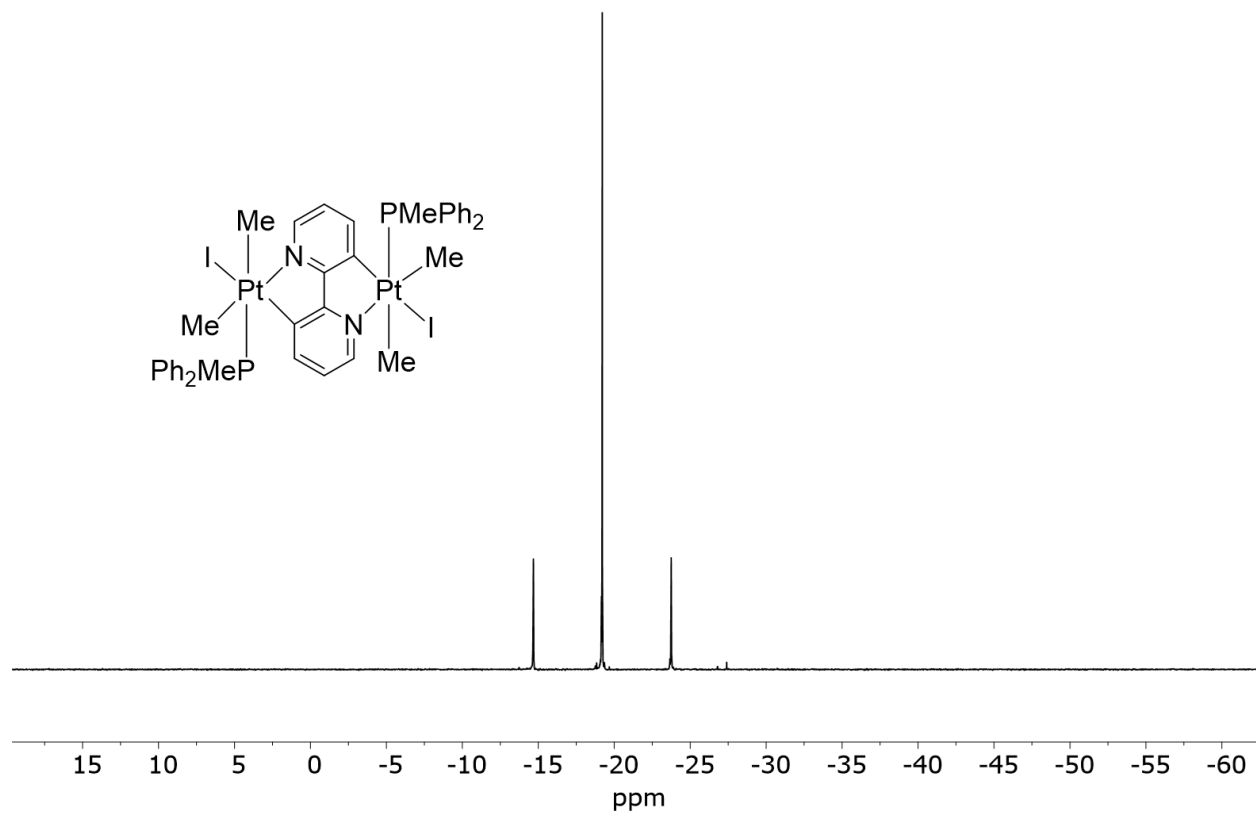

**Figure S6.**  $^{31}\text{P}$  NMR spectrum of complex **3** in  $\text{CDCl}_3$ .

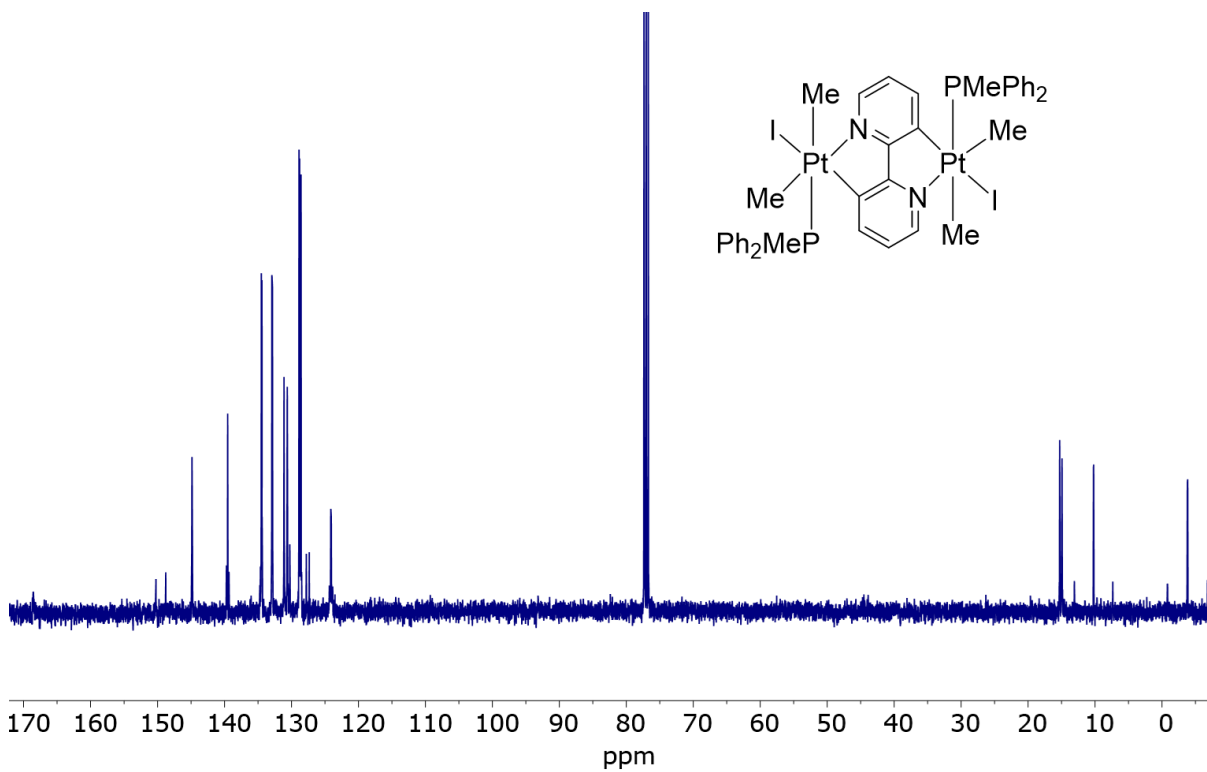

**Figure S7.** <sup>13</sup>C NMR spectrum of complex **3** in CDCl<sub>3</sub>.

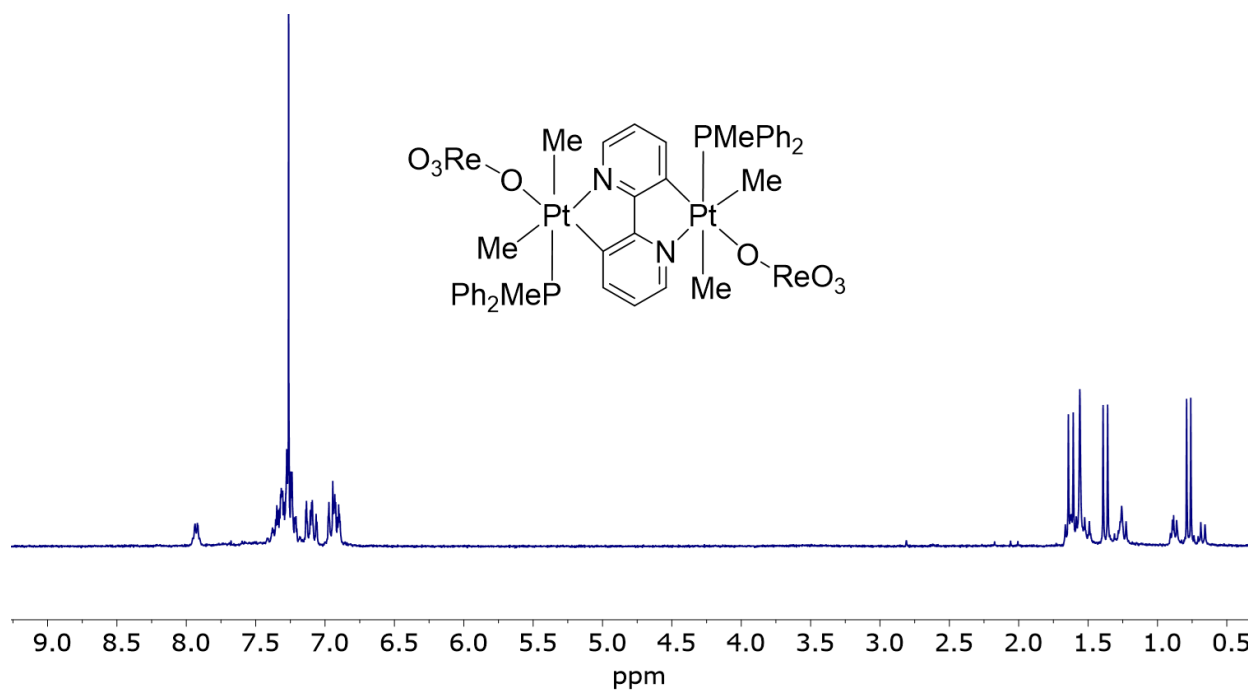

**Figure S8.** <sup>1</sup>H NMR spectrum (400 MHz) of complex **4** in CDCl<sub>3</sub>.

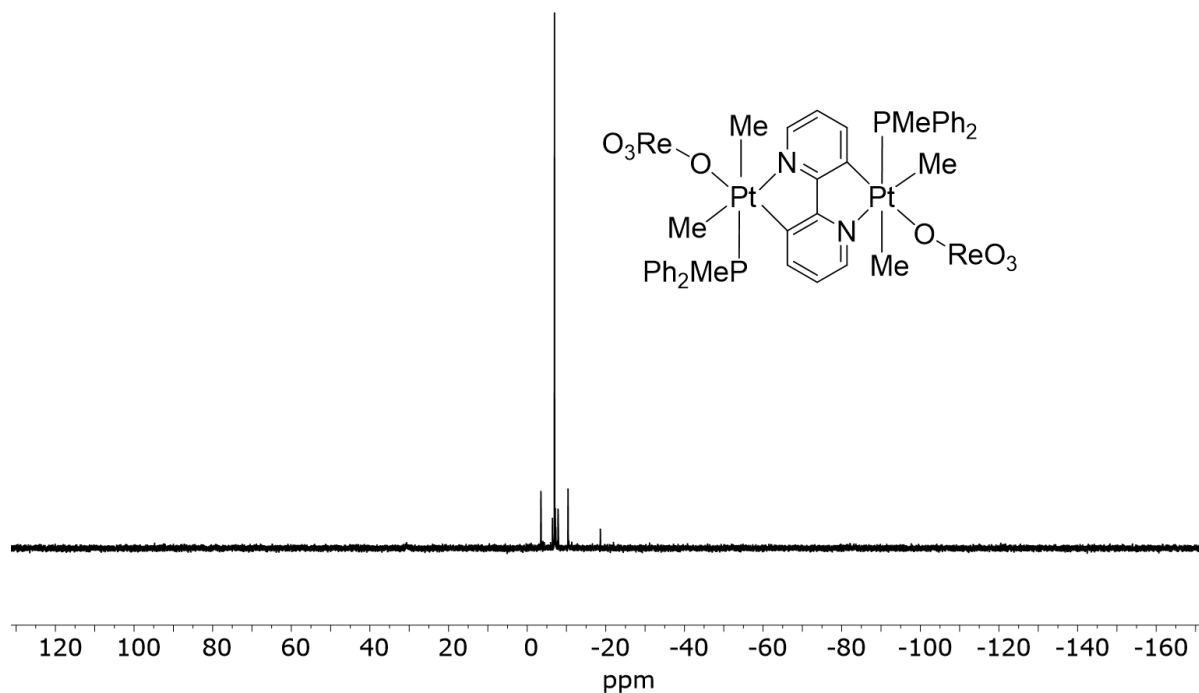

**Figure S9.**  $^{31}\text{P}$  NMR spectrum of complex **4** in  $\text{CDCl}_3$ .

**Table S1.** Crystal Data and Structure Refinement for **5.Hexane**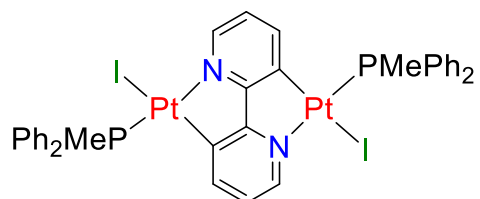

---

|                                   |                                                                                                              |
|-----------------------------------|--------------------------------------------------------------------------------------------------------------|
| Empirical formula                 | C <sub>42</sub> H <sub>46</sub> I <sub>2</sub> N <sub>2</sub> P <sub>2</sub> Pt <sub>2</sub>                 |
| Formula weight                    | 1284.73                                                                                                      |
| Temperature                       | 100(2) K                                                                                                     |
| Wavelength                        | 0.71073 Å                                                                                                    |
| Crystal system                    | Triclinic                                                                                                    |
| Space group                       | P-1                                                                                                          |
| Unit cell dimensions              | a = 11.721(3) Å    α = 71.461(11)°<br>b = 13.229(4) Å    β = 84.633(8)°<br>c = 14.256(4) Å    γ = 76.338(6)° |
| Volume                            | 2036.1(10) Å <sup>3</sup>                                                                                    |
| Z                                 | 2                                                                                                            |
| Density (calculated)              | 2.096 Mg/m <sup>3</sup>                                                                                      |
| Absorption coefficient            | 8.490 mm <sup>-1</sup>                                                                                       |
| F(000)                            | 1208                                                                                                         |
| Theta range for data collection   | 1.507 to 27.219°                                                                                             |
| Reflections collected             | 12953                                                                                                        |
| Independent reflections           | 8645 [R(int) = 0.0476]                                                                                       |
| Max. and min. transmission        | 0.7455 and 0.4740                                                                                            |
| Data / restraints / parameters    | 8645 / 0 / 455                                                                                               |
| Goodness-of-fit on F <sup>2</sup> | 0.992                                                                                                        |
| Final R indices [I > 2σ(I)]       | R1 = 0.0475, wR2 = 0.1048                                                                                    |

---



## Espenson's Approach for Determination of Higher and Lower Rate Constants

As explained in the main text, a double oxidative addition was observed during the reaction of dimeric Pt(II)-Pt(II) complex **2** with MeI and found that the rates were slower in the second step as compared to the first step.

To confirm that the higher rate constant,  $k_2$ , belongs to the first step and the second step is proceeded with the slower rate constant,  $k'_2$ , we used the biphasic equation (equation S1) in evaluating the two rate constants:

$$Abs_t = Abs_\infty + \alpha [\exp(-k_f t) + \beta [\exp(-k_s t)]] \quad (S1)$$

In this equation,  $k_f$  and  $k_s$  are the rate constants for the fast and slow steps, respectively, but do not identify a particular reaction step. Therefore, there are two cases pertaining to a sequence of reactions:

Case I:  $k_2 = k_f > k'_2 = k_s$       and      Case II:  $k_2 = k_s < k'_2 = k_f$

By using the molar absorptivities of Pt(II)-Pt(II) dimer **2** ( $\epsilon_2$ ) and the final Pt(IV)-Pt(IV) product **3** ( $\epsilon_3$ ), the molar absorptivity of the Pt(II)-Pt(IV) intermediate **A** ( $\epsilon_A$ ) can be calculated from the following equations (S2 and S3), depending upon which case is applicable:

$$\text{Case I: } \epsilon_A = (\epsilon_2 - \alpha)(1 - k_s/k_f) + \epsilon_3 k_s/k_f \quad (S2)$$

$$\text{Case II: } \epsilon_A = (\epsilon_2 - \beta)(1 - k_f/k_s) + \epsilon_3 k_f/k_s \quad (S3)$$

The calculated  $\epsilon_A$  values from the experimental data for different supposed cases are listed in Table S1. As an example, at 25 °C and 375 nm, the end results are as follows:

Before the MeI addition:  $\epsilon_2 = Abs/[2] = 0.999/(3.0 \times 10^{-4} \text{ M}) = 3330 \text{ M}^{-1} \text{ cm}^{-1}$

End of reaction:  $\epsilon_3 = Abs/[3] = 0.455/(3.0 \times 10^{-4} \text{ M}) = 1516 \text{ M}^{-1} \text{ cm}^{-1}$

The data for case I are preferable for two reasons. First, in case I, the value of  $\epsilon_A$  for 4 experiments at 375 nm is almost constant;  $\epsilon_A = 2.36 \times 10^3 \text{ M}^{-1} \text{ cm}^{-1}$ , whereas large scatter and in some cases negative values are obtained for  $\epsilon_A$  when case II was assumed. Second, the value of  $\epsilon_A$  at 375 nm in case I lies close to  $\epsilon_2$  ( $3330 \text{ M}^{-1} \text{ cm}^{-1}$ ), in which both of the related complexes have MLCT bands, and higher than  $\epsilon_3$ , as one would expect for the final product **3** with no MLCT band in the visible region.

**Table S2.** Rate Constants ( $k_2$  and  $k'_2$ ) and Calculated  $\epsilon_A$  Values at 375 nm for Cases I and II

| [MeI] / M | $10^3 k_s / \text{L mol}^{-1} \text{s}^{-1}$ | $10^3 k_f / \text{L mol}^{-1} \text{s}^{-1}$ | $\epsilon_A / \text{M}^{-1} \text{cm}^{-1}$ |         |
|-----------|----------------------------------------------|----------------------------------------------|---------------------------------------------|---------|
|           |                                              |                                              | Case I                                      | Case II |
| 0.42      | 2.1                                          | 4.7                                          | 2508.8                                      | -674.3  |
| 0.76      | 3.7                                          | 6.9                                          | 2366.4                                      | -82.6   |
| 1.00      | 5.0                                          | 8.4                                          | 2249.3                                      | 287.1   |
| 1.23      | 6.6                                          | 11.9                                         | 2323.1                                      | 64.7    |

**XYZ Cartesian coordinates of optimized structures**

|          |             |             |             |    |             |             |             |
|----------|-------------|-------------|-------------|----|-------------|-------------|-------------|
| <b>2</b> |             |             |             | C  | -0.29631300 | 0.46952900  | -0.47580300 |
| Pt       | 2.54011800  | 0.84841400  | -1.05331300 | C  | -2.24941700 | 1.36946000  | -1.32715000 |
| P        | 4.85127800  | 0.32180100  | -0.70220300 | C  | -1.51992600 | 2.14206700  | -2.22692100 |
| C        | 0.29657900  | -0.46928100 | 0.47568000  | C  | -0.12495500 | 2.06882300  | -2.22218000 |
| C        | 2.24969600  | -1.36875700 | 1.32748200  | H  | -3.33059200 | 1.41878000  | -1.29345700 |
| C        | 1.52019100  | -2.14128300 | 2.22730900  | H  | -2.04722900 | 2.79489200  | -2.91637800 |
| C        | 0.12520700  | -2.06826400 | 2.22233800  | H  | 0.43678300  | 2.67883200  | -2.92373300 |
| C        | 5.16293100  | -1.50063900 | -0.64533800 | Pt | -2.53986800 | -0.84831500 | 1.05302800  |
| C        | 4.47708800  | -2.29864000 | -1.57783300 | P  | -4.85109500 | -0.32138100 | 0.70263500  |
| C        | 4.68845700  | -3.67707000 | -1.62418600 | C  | -5.16234300 | 1.50106100  | 0.64393400  |
| C        | 5.57626600  | -4.28003600 | -0.72880100 | C  | -4.47547900 | 2.30004400  | 1.57482900  |
| C        | 6.25329500  | -3.49748900 | 0.20849200  | C  | -4.68656000 | 3.67856800  | 1.61972500  |
| C        | 6.05153400  | -2.11500100 | 0.24957800  | C  | -5.57510600 | 4.28061500  | 0.72445300  |
| C        | 5.59826300  | 1.01546300  | 0.83299700  | C  | -6.25316700 | 3.49706800  | -0.21126200 |
| C        | 4.74073000  | 1.45660400  | 1.85458300  | C  | -6.05168600 | 2.11449800  | -0.25088300 |
| C        | 5.25738600  | 2.00011900  | 3.03284900  | C  | -5.59928400 | -1.01647900 | -0.83130400 |
| C        | 6.63821800  | 2.11788200  | 3.20286500  | C  | -4.74249800 | -1.45791600 | -1.85339000 |
| C        | 7.50158700  | 1.69164900  | 2.19014300  | C  | -5.26000000 | -2.00244100 | -3.03081100 |
| C        | 6.98662200  | 1.14526400  | 1.01327200  | C  | -6.64094100 | -2.12096600 | -3.19944700 |
| H        | 3.33088300  | -1.41790600 | 1.29397200  | C  | -7.50355700 | -1.69447400 | -2.18619500 |
| H        | 2.04749100  | -2.79385800 | 2.91700500  | C  | -6.98774700 | -1.14705400 | -1.01017000 |
| H        | -0.43652600 | -2.67818800 | 2.92396900  | H  | -3.76449000 | 1.83863700  | 2.25607500  |
| H        | 3.76665100  | -1.83655300 | -2.25919500 | H  | -4.15002800 | 4.28258700  | 2.34624300  |
| H        | 4.15271500  | -4.28031000 | -2.35193400 | H  | -5.73338500 | 5.35514900  | 0.75296500  |
| H        | 5.73476600  | -5.35450600 | -0.75845400 | H  | -6.94053500 | 3.95956800  | -0.91441400 |
| H        | 6.94007800  | -3.96070400 | 0.91174500  | H  | -6.58477000 | 1.51978600  | -0.98583400 |
| H        | 6.58380800  | -1.52110300 | 0.98576800  | H  | -3.66718200 | -1.38357400 | -1.71780300 |
| H        | 3.66550800  | 1.38279300  | 1.71798200  | H  | -4.58328700 | -2.33974900 | -3.81091600 |
| H        | 4.58009500  | 2.33721100  | 3.81254500  | H  | -7.04436300 | -2.54898800 | -4.11296600 |
| H        | 7.04098500  | 2.54509800  | 4.11705100  | H  | -8.57887600 | -1.79030200 | -2.30849300 |
| H        | 8.57683600  | 1.78687700  | 2.31352000  | H  | -7.67559300 | -0.82611600 | -0.23389200 |
| H        | 7.67505200  | 0.82452700  | 0.23742500  | C  | 3.01884700  | 2.31985000  | -2.43135000 |

|          |             |             |             |    |             |             |             |
|----------|-------------|-------------|-------------|----|-------------|-------------|-------------|
| H        | 2.46460900  | 3.23578900  | -2.19130300 | H  | -6.38464600 | -2.08060200 | -4.11489600 |
| H        | 4.07982100  | 2.58102900  | -2.47486100 | H  | -4.34303700 | -2.01752400 | -5.53652500 |
| H        | 2.71368200  | 1.99556900  | -3.43656700 | H  | -2.12755600 | -1.57549700 | -4.48869400 |
| C        | -3.01892500 | -2.31886400 | 2.43190700  | H  | -1.95916800 | -1.18881200 | -2.06678500 |
| H        | -4.07960100 | -2.58164700 | 2.47341200  | C  | 0.06605000  | -0.36098500 | 0.63037900  |
| H        | -2.46282600 | -3.23424500 | 2.19415400  | C  | 1.41457900  | -1.72080400 | 1.93939900  |
| H        | -2.71643900 | -1.99291800 | 3.43740900  | C  | 0.43679700  | -1.75953600 | 2.93259500  |
| N        | 1.65124500  | -0.53936100 | 0.45731100  | C  | -0.75976400 | -1.05789900 | 2.75631000  |
| N        | -1.65096400 | 0.53985000  | -0.45718600 | H  | 2.36176900  | -2.24044800 | 2.03319400  |
| C        | 0.54209400  | 1.21996100  | -1.32690900 | H  | 0.61788700  | -2.33046400 | 3.83764500  |
| C        | -0.54185100 | -1.21975800 | 1.32673300  | H  | -1.51172800 | -1.08332800 | 3.53749600  |
| C        | 6.04005500  | 0.83415100  | -2.02896300 | Pt | 2.55888500  | -0.79613000 | -1.00897700 |
| H        | 6.13812900  | 1.92255800  | -2.05013600 | P  | 3.91465700  | 1.17575700  | -0.12968700 |
| H        | 7.02481800  | 0.38591600  | -1.87263400 | C  | 3.34432900  | 2.80841100  | -0.78113100 |
| H        | 5.64918100  | 0.49756300  | -2.99318700 | C  | 3.83085200  | 3.29022700  | -2.00856700 |
| C        | -6.03897900 | -0.83190600 | 2.03090900  | C  | 3.34855600  | 4.48659400  | -2.54553300 |
| H        | -7.02358000 | -0.38310500 | 1.87518000  | C  | 2.37359500  | 5.21973300  | -1.86758600 |
| H        | -6.13777400 | -1.92022400 | 2.05309300  | C  | 1.88401100  | 4.75016900  | -0.64627500 |
| H        | -5.64691500 | -0.49480600 | 2.99446900  | C  | 2.36226300  | 3.55430400  | -0.10886000 |
| <b>3</b> |             |             |             | C  | 4.07466800  | 1.43458200  | 1.68774300  |
| Pt       | -2.55884200 | 0.79635100  | 1.00878900  | C  | 5.31874800  | 1.68672900  | 2.28991200  |
| P        | -3.91457800 | -1.17578500 | 0.12987300  | C  | 5.41207800  | 1.89151400  | 3.66806400  |
| C        | -0.06593200 | 0.36135300  | -0.63049600 | C  | 4.26675800  | 1.85457000  | 4.46541800  |
| C        | -1.41438200 | 1.72133800  | -1.93943100 | C  | 3.02465500  | 1.60587900  | 3.87818600  |
| C        | -0.43654200 | 1.76018800  | -2.93256300 | C  | 2.93045200  | 1.38950300  | 2.50251500  |
| C        | 0.75997900  | 1.05846600  | -2.75632300 | H  | 4.59648000  | 2.74692000  | -2.55268300 |
| C        | -3.34409400 | -2.80834100 | 0.78139700  | H  | 3.74265900  | 4.84495800  | -3.49248500 |
| C        | -3.82995400 | -3.28978000 | 2.00924600  | H  | 2.00088200  | 6.15113600  | -2.28419800 |
| C        | -3.34749700 | -4.48607800 | 2.54621700  | H  | 1.13117700  | 5.31657300  | -0.10509300 |
| C        | -2.37303300 | -5.21951300 | 1.86787100  | H  | 1.97473300  | 3.21561100  | 0.84621700  |
| C        | -1.88410500 | -4.75031300 | 0.64615800  | H  | 6.22388600  | 1.72677100  | 1.69481500  |
| C        | -2.36252200 | -3.55451900 | 0.10872900  | H  | 6.38351800  | 2.08185700  | 4.11556500  |
| C        | -4.07491000 | -1.43498700 | -1.68747000 | H  | 4.34195600  | 2.01540700  | 5.53710900  |
| C        | -5.31930500 | -1.68596200 | -2.28946900 | H  | 2.12710600  | 1.57082400  | 4.48903800  |
| C        | -5.41294900 | -1.89128200 | -3.66752000 | H  | 1.95927600  | 1.18501200  | 2.06695200  |
| C        | -4.26760500 | -1.85621800 | -4.46492100 | C  | -3.50031800 | 0.58654800  | 2.85838300  |
| C        | -3.02515500 | -1.60894300 | -3.87782400 | H  | -2.86938200 | 1.03083300  | 3.63217900  |
| C        | -2.93063700 | -1.39197600 | -2.50226600 | H  | -4.46103100 | 1.10410800  | 2.83017600  |
| H        | -2.36157100 | 2.24098400  | -2.03322800 | H  | -3.65384500 | -0.47074300 | 3.09207800  |
| H        | -0.61756500 | 2.33125100  | -3.83754200 | C  | 3.50047900  | -0.58616300 | -2.85850100 |
| H        | 1.51198200  | 1.08397400  | -3.53746800 | H  | 4.46115000  | -1.10380100 | -2.83030400 |
| H        | -4.59517800 | -2.74623600 | 2.55369100  | H  | 2.86955100  | -1.03031200 | -3.63238100 |
| H        | -3.74108200 | -4.84415300 | 3.49349400  | H  | 3.65409200  | 0.47113900  | -3.09208400 |
| H        | -2.00019500 | -6.15086100 | 2.28449200  | N  | -1.23037700 | 1.02480500  | -0.81117200 |
| H        | -1.13166200 | -5.31694500 | 0.10467100  | N  | 1.23048500  | -1.02444900 | 0.81104600  |
| H        | -1.97552000 | -3.21608800 | -0.84666200 | C  | -0.97190200 | -0.33873000 | 1.57773400  |
| H        | -6.22446800 | -1.72460100 | -1.69430600 | C  | 0.97204700  | 0.33914900  | -1.57782300 |
|          |             |             |             | C  | -1.57492700 | 2.45788700  | 1.85973000  |

|          |             |             |             |    |             |             |             |
|----------|-------------|-------------|-------------|----|-------------|-------------|-------------|
| H        | -1.03672700 | 2.97725300  | 1.06300000  | H  | -8.31044155 | -1.12712777 | -2.94872549 |
| H        | -2.33263500 | 3.11445900  | 2.28997100  | H  | -7.44994055 | -0.71274877 | -0.68419649 |
| H        | -0.87710000 | 2.13203000  | 2.63509800  | C  | 0.20445400  | 0.68084400  | 0.12256800  |
| I        | -4.60298800 | 2.58374400  | 0.00948900  | C  | 1.98006800  | 2.13970500  | 0.36920300  |
| C        | 1.57486800  | -2.45760300 | -1.85990700 | C  | 1.09008400  | 3.17227900  | 0.64885700  |
| H        | 1.03732600  | -2.97737000 | -1.06299700 | C  | -0.28720600 | 2.93743000  | 0.64059600  |
| H        | 0.87646200  | -2.13165600 | -2.63471600 | H  | 3.04612000  | 2.30991000  | 0.35492800  |
| H        | 2.33246300  | -3.11383500 | -2.29087000 | H  | 1.48667300  | 4.15903900  | 0.86602200  |
| I        | 4.60283100  | -2.58377100 | -0.00977100 | H  | -0.96717400 | 3.75556400  | 0.85014100  |
| C        | -5.65480200 | -1.06641100 | 0.73004800  | Pt | 2.67552100  | -0.84695100 | -0.32340300 |
| H        | -5.65506900 | -0.84378900 | 1.79886500  | P  | 4.78301968  | 0.15914423  | -0.35376883 |
| H        | -6.14594100 | -0.23458000 | 0.22061900  | C  | 4.77516068  | 1.77243723  | -1.25559083 |
| H        | -6.20385800 | -1.99595700 | 0.55808600  | C  | 4.06870768  | 1.83053123  | -2.46962083 |
| C        | 5.65495200  | 1.06633200  | -0.72965900 | C  | 4.05755768  | 3.00258223  | -3.22639683 |
| H        | 6.14599300  | 0.23446600  | -0.22019500 | C  | 4.74006168  | 4.13521523  | -2.77364383 |
| H        | 5.65534600  | 0.84372300  | -1.79847700 | C  | 5.43749568  | 4.08831723  | -1.56509383 |
| H        | 6.20403100  | 1.99584600  | -0.55760500 | C  | 5.45912368  | 2.91289923  | -0.80937783 |
| <b>5</b> |             |             |             | C  | 5.48335268  | 0.49149023  | 1.31500817  |
| Pt       | -2.67554100 | 0.84714900  | 0.32229800  | C  | 4.62506568  | 0.46697223  | 2.42681817  |
| P        | -4.68954955 | -0.11464577 | 0.35305751  | C  | 5.11772968  | 0.70427623  | 3.71164417  |
| C        | -0.20449000 | -0.68063000 | -0.12375800 | C  | 6.47642868  | 0.96113723  | 3.90399217  |
| C        | -1.98009700 | -2.13950000 | -0.37039100 | C  | 7.34214768  | 0.97783823  | 2.80741317  |
| C        | -1.09010700 | -3.17207100 | -0.65002900 | C  | 6.85126668  | 0.74312623  | 1.52204317  |
| C        | 0.28718300  | -2.93722000 | -0.64174300 | H  | 3.51915668  | 0.95860223  | -2.81639383 |
| C        | -4.68074155 | -1.72767577 | 1.25533751  | H  | 3.50927868  | 3.03347523  | -4.16374083 |
| C        | -3.97326655 | -1.78532577 | 2.46879151  | H  | 4.72448068  | 5.05053523  | -3.35855883 |
| C        | -3.96132555 | -2.95715877 | 3.22589551  | H  | 5.96629968  | 4.96682023  | -1.20579183 |
| C        | -4.64405655 | -4.09001277 | 2.77403851  | H  | 6.00366368  | 2.89224923  | 0.12933417  |
| C        | -5.34250855 | -4.04355477 | 1.56605951  | H  | 3.57103268  | 0.24511123  | 2.28843017  |
| C        | -5.36492455 | -2.86835677 | 0.81002251  | H  | 4.44040368  | 0.67896023  | 4.56048517  |
| C        | -5.39104655 | -0.44758177 | -1.31511549 | H  | 6.86136668  | 1.14057223  | 4.90391017  |
| C        | -4.53364055 | -0.42295277 | -2.42760249 | H  | 8.40172168  | 1.16963323  | 2.95102917  |
| C        | -5.02722255 | -0.66067977 | -3.71199949 | H  | 7.54283668  | 0.75600123  | 0.68574717  |
| C        | -6.38597455 | -0.91808677 | -3.90323649 | N  | -1.54516000 | -0.89670200 | -0.09640000 |
| C        | -7.25082755 | -0.93490477 | -2.80597649 | N  | 1.54512300  | 0.89691400  | 0.09518900  |
| C        | -6.75902955 | -0.69976677 | -1.52103549 | C  | -0.77804800 | 1.65237300  | 0.36978200  |
| H        | -3.04614800 | -2.30971300 | -0.35612800 | C  | 0.77802100  | -1.65216400 | -0.37091400 |
| H        | -1.48668900 | -4.15883400 | -0.86719400 | C  | -6.04924455 | 0.75952123  | 1.25214951  |
| H        | 0.96715600  | -3.75535700 | -0.85125800 | H  | -6.31521455 | 1.68027123  | 0.72992951  |
| H        | -3.42353755 | -0.91322477 | 2.81485251  | H  | -6.92502355 | 0.11142723  | 1.34417151  |
| H        | -3.41225755 | -2.98770977 | 4.16278751  | H  | -5.69332255 | 1.01783323  | 2.25260351  |
| H        | -4.62786555 | -5.00516177 | 3.35920351  | C  | 6.14320868  | -0.71497677 | -1.25216283 |
| H        | -5.87149455 | -4.92223077 | 1.20745151  | H  | 7.01912968  | -0.06696877 | -1.34344283 |
| H        | -5.91024755 | -2.84805277 | -0.12824149 | H  | 6.40871468  | -1.63589077 | -0.72999683 |
| H        | -3.47958155 | -0.20067977 | -2.29008049 | H  | 5.78791768  | -0.97299277 | -2.25291783 |
| H        | -4.35057155 | -0.63526877 | -4.56137549 | I  | 3.82327257  | -3.27553511 | -0.58074323 |
| H        | -6.77162755 | -1.09785377 | -4.90281849 | I  | -3.82491480 | 3.27903440  | 0.58046464  |

|          |             |             |             |            |             |             |             |
|----------|-------------|-------------|-------------|------------|-------------|-------------|-------------|
| <b>A</b> |             |             |             | C          | 4.33716600  | 2.28827500  | -0.50037400 |
| Pt       | -2.60619300 | -1.04720100 | -0.84035900 | C          | 4.64927300  | 3.53192200  | -1.04606600 |
| P        | -3.18936400 | 1.45059900  | -0.77345100 | C          | 5.97531600  | 3.95617900  | -1.10521900 |
| C        | -0.25072700 | -0.75764500 | 1.00913500  | C          | 6.98846900  | 3.13266500  | -0.61606600 |
| C        | -2.08695300 | -1.06576300 | 2.38031400  | C          | 6.67867700  | 1.88615600  | -0.07594700 |
| C        | -1.26793100 | -0.99365100 | 3.50242500  | H          | 4.16812600  | -2.95640600 | 0.47360300  |
| C        | 0.09901400  | -0.76754200 | 3.34639400  | H          | 4.74604200  | -4.76862300 | -1.10360300 |
| C        | -2.02764500 | 2.68327700  | -1.52516600 | H          | 6.16094200  | -4.28741900 | -3.08855000 |
| C        | -1.36118500 | 2.34496300  | -2.71028900 | H          | 7.00756700  | -1.98555800 | -3.46938700 |
| C        | -0.53889100 | 3.26687100  | -3.35427100 | H          | 6.46255100  | -0.18248400 | -1.88113500 |
| C        | -0.36539700 | 4.54234000  | -2.82026300 | H          | 3.30125400  | 1.97407900  | -0.43293400 |
| C        | -1.02597500 | 4.89137400  | -1.64397500 | H          | 3.85421900  | 4.17134100  | -1.41488700 |
| C        | -1.85402400 | 3.97199500  | -1.00218200 | H          | 6.21866700  | 4.92705800  | -1.52394500 |
| C        | -3.51696300 | 2.12650400  | 0.90409800  | H          | 8.02217100  | 3.46033800  | -0.65206300 |
| C        | -4.81172800 | 2.44625000  | 1.33059900  | H          | 7.48262200  | 1.26469400  | 0.30144600  |
| C        | -5.03202300 | 2.93415000  | 2.61826200  | C          | -3.33042800 | -1.20859700 | -2.79188000 |
| C        | -3.96427300 | 3.10989100  | 3.49472600  | H          | -2.99599000 | -2.14855000 | -3.23143400 |
| C        | -2.67180200 | 2.78844900  | 3.08097400  | H          | -4.41850200 | -1.19234700 | -2.76963100 |
| C        | -2.45000400 | 2.29347000  | 1.79917200  | H          | -2.97423900 | -0.38289400 | -3.41009400 |
| H        | -3.15564000 | -1.22330800 | 2.45250300  | C          | 3.20735800  | -0.02531800 | 3.40571600  |
| H        | -1.70722200 | -1.10880700 | 4.48729100  | H          | 4.14991200  | 0.51720600  | 3.49970000  |
| H        | 0.72254400  | -0.70520800 | 4.23172900  | H          | 2.44821900  | 0.55453200  | 3.93614300  |
| H        | -1.48029400 | 1.35824800  | -3.13837800 | H          | 3.32133900  | -0.98534500 | 3.92354800  |
| H        | -0.03067300 | 2.98426200  | -4.27025400 | N          | -1.58152900 | -0.94648000 | 1.14862200  |
| H        | 0.27789700  | 5.25998400  | -3.31860900 | N          | 1.57656300  | -0.63456900 | -0.51650100 |
| H        | -0.90149500 | 5.88368300  | -1.22293100 | C          | -0.66383200 | -0.87188200 | -1.43400600 |
| H        | -2.36218700 | 4.26493000  | -0.09180200 | C          | 0.66295900  | -0.63176100 | 2.07060300  |
| H        | -5.65844600 | 2.31631700  | 0.66828000  | C          | -2.27215500 | -3.12631300 | -0.90821800 |
| H        | -6.04172900 | 3.17704900  | 2.93236500  | H          | -1.89020700 | -3.43803200 | 0.06409900  |
| H        | -4.13700500 | 3.49262500  | 4.49512600  | H          | -3.22298500 | -3.61434600 | -1.10965600 |
| H        | -1.83362000 | 2.91759600  | 3.75744200  | H          | -1.55134400 | -3.37498900 | -1.68650800 |
| H        | -1.43754500 | 2.04926900  | 1.49597300  | I          | -5.23772100 | -1.56342300 | 0.23608900  |
| C        | 0.23537000  | -0.73719700 | -0.36507900 | C          | 6.16677300  | -0.51873500 | 1.96391300  |
| C        | 2.07439300  | -0.67369900 | -1.75933800 | H          | 7.14690100  | -0.63926300 | 1.50215300  |
| C        | 1.26250500  | -0.83580200 | -2.87565800 | H          | 6.20940100  | 0.28761800  | 2.69559700  |
| C        | -0.11808400 | -0.94491200 | -2.71272100 | H          | 5.90986400  | -1.44380200 | 2.48099400  |
| H        | 3.14818700  | -0.59406100 | -1.85821200 | C          | -4.72529600 | 1.79749700  | -1.73225000 |
| H        | 1.71250300  | -0.88326600 | -3.86071700 | H          | -4.52654100 | 1.58552100  | -2.78290900 |
| H        | -0.74784900 | -1.08983600 | -3.58254200 | H          | -5.53139000 | 1.14485400  | -1.39842500 |
| Pt       | 2.60362100  | -0.35245400 | 1.45292800  | H          | -5.01945600 | 2.84360900  | -1.63668100 |
| P        | 4.86436000  | -0.18065400 | 0.69805600  |            |             |             |             |
| C        | 5.29238300  | -1.44676500 | -0.57912000 | <b>IMA</b> |             |             |             |
| C        | 4.80820900  | -2.74760800 | -0.37821800 | Pt         | -2.15262100 | -0.68201900 | 1.39541600  |
| C        | 5.12590800  | -3.76642500 | -1.27244900 | P          | -4.50619800 | -1.20292400 | 0.89381800  |
| C        | 5.91925700  | -3.49560500 | -2.38727300 | C          | 0.11723700  | -0.89150900 | -0.57557200 |
| C        | 6.39458400  | -2.20338800 | -2.60085800 | C          | -1.77142600 | -1.53046600 | -1.75101100 |
| C        | 6.08658600  | -1.18306200 | -1.70076000 | C          | -1.01486800 | -1.69143900 | -2.90887900 |
| C        | 5.34829400  | 1.44652200  | -0.01697400 | C          | 0.35931200  | -1.44999900 | -2.86798600 |

|    |             |             |             |            |             |             |             |
|----|-------------|-------------|-------------|------------|-------------|-------------|-------------|
| C  | -4.75022200 | -2.63461200 | -0.23238700 | H          | 4.78104300  | 5.21750600  | 2.00423000  |
| C  | -3.99696800 | -3.79583200 | 0.02463200  | H          | 6.39651100  | 3.51654300  | 2.84149300  |
| C  | -4.17315600 | -4.93436300 | -0.76111600 | H          | 6.58928700  | 1.32291500  | 1.72704600  |
| C  | -5.09185400 | -4.92229300 | -1.81593000 | H          | 4.42341400  | -2.20717800 | 0.80522100  |
| C  | -5.83673700 | -3.77053500 | -2.07902800 | H          | 5.70213700  | -3.83495200 | 2.16589500  |
| C  | -5.67109700 | -2.62955000 | -1.29022700 | H          | 8.16743800  | -3.59098000 | 2.41050200  |
| C  | -5.23123700 | 0.33337600  | 0.20573900  | H          | 9.33935300  | -1.70663500 | 1.28701800  |
| C  | -4.44844100 | 0.95177700  | -0.79762500 | H          | 8.07341800  | -0.07778500 | -0.05171700 |
| C  | -4.81100900 | 2.16877300  | -1.35702700 | C          | -2.78492500 | -0.12279300 | 3.29002700  |
| C  | -5.98720400 | 2.78872700  | -0.93219600 | H          | -2.10694900 | 0.62390200  | 3.70687000  |
| C  | -6.78460800 | 2.18708600  | 0.05718600  | H          | -3.78862700 | 0.30978400  | 3.26735000  |
| C  | -6.40836700 | 0.96290400  | 0.63453600  | H          | -2.78642900 | -1.01680400 | 3.92804000  |
| H  | -2.83478300 | -1.73224200 | -1.73923700 | C          | 3.48454100  | -1.05012800 | -3.19946900 |
| H  | -1.50582300 | -2.00463800 | -3.82579100 | H          | 4.56335500  | -1.06368100 | -3.37469500 |
| H  | 0.94265300  | -1.57852300 | -3.77509800 | H          | 3.09669000  | -2.04588400 | -3.44912700 |
| H  | -3.26784000 | -3.80994100 | 0.83502700  | H          | 3.03862300  | -0.32677800 | -3.89710100 |
| H  | -3.58866800 | -5.82676700 | -0.55543100 | N          | -1.21090600 | -1.13798300 | -0.59854100 |
| H  | -5.22333300 | -5.80750400 | -2.43231500 | N          | 1.98594000  | -0.20838500 | 0.73626900  |
| H  | -6.55024800 | -3.75681400 | -2.89903900 | C          | -0.19442200 | -0.25099100 | 1.81297000  |
| H  | -6.25611800 | -1.73988600 | -1.50121000 | C          | 0.98122100  | -1.03724100 | -1.67823600 |
| H  | -3.51708800 | 0.49776100  | -1.12052900 | C          | -2.43514300 | 1.22394600  | 0.80364400  |
| H  | -4.17171600 | 2.63136400  | -2.10075700 | H          | -2.02385000 | 1.13393700  | -0.19406200 |
| H  | -6.27322900 | 3.74507100  | -1.35872400 | H          | -3.51186000 | 1.37933600  | 0.84767300  |
| H  | -7.69323900 | 2.67861600  | 0.39345000  | H          | -1.87619200 | 1.87660800  | 1.47049400  |
| H  | -7.02790200 | 0.52757500  | 1.41134500  | C          | -5.55696100 | -1.79662200 | 2.29092900  |
| C  | 0.65361200  | -0.43478300 | 0.70761600  | H          | -5.08485200 | -2.68960300 | 2.71237600  |
| C  | 2.53839000  | 0.18190800  | 1.89652300  | H          | -5.63392200 | -1.04079300 | 3.07635000  |
| C  | 1.78555900  | 0.35811400  | 3.05316500  | H          | -6.55624000 | -2.06165900 | 1.93487400  |
| C  | 0.40457000  | 0.15112700  | 3.00790700  | C          | 6.26873400  | 0.59722900  | -2.10728500 |
| H  | 3.60559600  | 0.36528500  | 1.89177300  | H          | 7.16924600  | 1.09932000  | -1.74347200 |
| H  | 2.27617100  | 0.66868900  | 3.97063500  | H          | 6.55535800  | -0.30281600 | -2.65776600 |
| H  | -0.18016700 | 0.30710500  | 3.90835100  | H          | 5.73951300  | 1.27240000  | -2.78590400 |
| Pt | 2.92994200  | -0.56894800 | -1.26630500 | I          | -2.75117600 | 4.20000700  | -0.94619900 |
| P  | 5.13798100  | 0.16131200  | -0.70551800 |            |             |             |             |
| C  | 5.08016600  | 1.75263500  | 0.23577000  | <b>IMB</b> |             |             |             |
| C  | 4.16261000  | 2.71994800  | -0.22268700 | Pt         | 2.45909700  | -0.60967200 | 0.86696400  |
| C  | 4.06036000  | 3.96224600  | 0.40414900  | P          | 3.05989400  | 1.43453200  | -0.53595800 |
| C  | 4.86557300  | 4.25359700  | 1.50916800  | C          | -0.00017000 | -1.13848000 | -0.76482500 |
| C  | 5.77269400  | 3.29767500  | 1.97877100  | C          | 1.74397000  | -2.11386700 | -1.94533800 |
| C  | 5.88287400  | 2.05381000  | 1.34633000  | C          | 0.84523200  | -2.52868500 | -2.92753900 |
| C  | 6.14588100  | -1.01296700 | 0.29387200  | C          | -0.51097000 | -2.20864000 | -2.80806200 |
| C  | 5.49667600  | -2.08762200 | 0.92459600  | C          | 1.64016600  | 2.56450700  | -0.81170800 |
| C  | 6.21963900  | -3.00871000 | 1.68603600  | C          | 1.02967600  | 3.17974900  | 0.29655900  |
| C  | 7.60302900  | -2.87266300 | 1.82148200  | C          | -0.07066400 | 4.01930400  | 0.12658900  |
| C  | 8.26179700  | -1.81405200 | 1.19089500  | C          | -0.58928100 | 4.24503300  | -1.15209200 |
| C  | 7.54059000  | -0.89135100 | 0.43162600  | C          | 0.00046700  | 3.62988400  | -2.25735400 |
| H  | 3.51529100  | 2.49117100  | -1.06654800 | C          | 1.11049400  | 2.79695100  | -2.09064900 |
| H  | 3.34475800  | 4.69469600  | 0.03637000  | C          | 4.42940700  | 2.48764800  | 0.10122500  |

|    |             |             |             |            |             |             |             |
|----|-------------|-------------|-------------|------------|-------------|-------------|-------------|
| C  | 4.33745600  | 3.88308000  | 0.21306700  | H          | -7.66486500 | 1.11461700  | -0.02330500 |
| C  | 5.42675900  | 4.62527700  | 0.67654800  | C          | 3.37096100  | 0.14174400  | 2.57958100  |
| C  | 6.61712800  | 3.98518600  | 1.02598300  | H          | 2.97458500  | -0.34648200 | 3.47307000  |
| C  | 6.71729200  | 2.59597700  | 0.91088600  | H          | 4.43843100  | -0.08305700 | 2.48491500  |
| C  | 5.63008200  | 1.84852500  | 0.45736500  | H          | 3.23856100  | 1.22409000  | 2.65592600  |
| H  | 2.80690600  | -2.33132800 | -1.98842000 | C          | -3.70583200 | -1.48722400 | -2.94561500 |
| H  | 1.21238300  | -3.09774500 | -3.77620300 | H          | -4.48686700 | -0.79237000 | -3.27735400 |
| H  | -1.19154100 | -2.54105000 | -3.58621300 | H          | -2.94797300 | -1.52603800 | -3.73332000 |
| H  | 1.41902300  | 3.01118500  | 1.29615900  | H          | -4.15860600 | -2.48456800 | -2.85508100 |
| H  | -0.52340600 | 4.49447900  | 0.99217300  | N          | 1.31691500  | -1.42183700 | -0.87977000 |
| H  | -1.44486400 | 4.90106100  | -1.28573700 | N          | -1.69100400 | -0.20954100 | 0.64456900  |
| H  | -0.39560900 | 3.80103400  | -3.25424100 | C          | 0.60604000  | -0.09142100 | 1.40738900  |
| H  | 1.55745800  | 2.33747300  | -2.96547600 | C          | -0.99216300 | -1.48280700 | -1.70494700 |
| H  | 3.42237900  | 4.39642900  | -0.06212500 | C          | 2.11466200  | -2.38379500 | 1.93982800  |
| H  | 5.34228800  | 5.70534300  | 0.75977000  | H          | 1.41536600  | -3.01103100 | 1.38138300  |
| H  | 7.46274000  | 4.56498000  | 1.38548300  | H          | 3.09533200  | -2.86566100 | 1.99716000  |
| H  | 7.64084400  | 2.09000400  | 1.17803400  | H          | 1.72737500  | -2.18481000 | 2.94112600  |
| H  | 5.71963600  | 0.76787200  | 0.37158200  | C          | -6.47958800 | -1.18785000 | -1.20277900 |
| C  | -0.37225500 | -0.44929400 | 0.46462000  | H          | -7.42486500 | -1.01871800 | -0.68054700 |
| C  | -2.07819900 | 0.40106000  | 1.77501200  | H          | -6.55409600 | -0.80338100 | -2.22301500 |
| C  | -1.17057100 | 0.78507000  | 2.75940800  | H          | -6.28955800 | -2.26372200 | -1.24702000 |
| C  | 0.19309000  | 0.53177500  | 2.58238300  | C          | 3.65111200  | 0.96008400  | -2.21636100 |
| H  | -3.14049600 | 0.57029200  | 1.89962200  | H          | 4.52988300  | 0.32229400  | -2.08370900 |
| H  | -1.53060400 | 1.26974800  | 3.66100000  | H          | 2.88482700  | 0.38019400  | -2.73764000 |
| H  | 0.90130800  | 0.81891700  | 3.35051800  | H          | 3.91889800  | 1.84100600  | -2.80673800 |
| Pt | -2.88008700 | -0.89737800 | -1.14601100 | I          | 5.70801500  | -2.27416300 | -0.43124900 |
| P  | -5.06637100 | -0.37866900 | -0.32241800 |            |             |             |             |
| C  | -5.29528400 | -1.00984500 | 1.39986900  | <b>IMC</b> |             |             |             |
| C  | -4.78564200 | -2.28945500 | 1.68423100  | Pt         | -3.17944000 | -0.96954500 | -1.14603700 |
| C  | -4.94279700 | -2.85086500 | 2.95165300  | P          | -4.06361500 | 1.21325900  | -0.11308000 |
| C  | -5.59715800 | -2.13525200 | 3.95832200  | C          | -0.65276400 | -0.98146200 | 0.50266400  |
| C  | -6.09586900 | -0.85945700 | 3.68919100  | C          | -2.24496400 | -2.05160700 | 1.79642500  |
| C  | -5.94935900 | -0.29877300 | 2.41695500  | C          | -1.30273500 | -2.28270500 | 2.79172100  |
| C  | -5.53150300 | 1.40226900  | -0.28698300 | C          | 0.00360500  | -1.82309000 | 2.62286500  |
| C  | -4.51986900 | 2.36497600  | -0.43976600 | C          | -3.17310000 | 2.81085500  | -0.40735000 |
| C  | -4.82752500 | 3.72728200  | -0.42225500 | C          | -2.53357400 | 3.01742600  | -1.63633500 |
| C  | -6.14952400 | 4.14566400  | -0.26050100 | C          | -1.92578700 | 4.23715600  | -1.92812300 |
| C  | -7.16587500 | 3.19707900  | -0.11865900 | C          | -1.94486100 | 5.26936300  | -0.99218100 |
| C  | -6.86033500 | 1.83533900  | -0.13278600 | C          | -2.58195700 | 5.07673700  | 0.23293100  |
| H  | -4.25410600 | -2.84000300 | 0.91166200  | C          | -3.19543200 | 3.85950800  | 0.52322100  |
| H  | -4.54654800 | -3.84189500 | 3.15476800  | C          | -4.26545100 | 1.16385700  | 1.71317600  |
| H  | -5.71289200 | -2.56866700 | 4.94780700  | C          | -5.52360900 | 1.03001700  | 2.31275400  |
| H  | -6.60066800 | -0.29553700 | 4.46880800  | C          | -5.64146700 | 0.96367400  | 3.70086400  |
| H  | -6.34165700 | 0.69481800  | 2.22521700  | C          | -4.50755100 | 1.03012600  | 4.50642200  |
| H  | -3.49141800 | 2.04524300  | -0.58582100 | C          | -3.24949300 | 1.15920600  | 3.91808700  |
| H  | -4.03401500 | 4.45957900  | -0.54132100 | C          | -3.12847100 | 1.21908100  | 2.53287200  |
| H  | -6.38921700 | 5.20528600  | -0.25046900 | H          | -3.27383500 | -2.37795100 | 1.88349700  |
| H  | -8.19756400 | 3.51586600  | 0.00074100  | H          | -1.59322200 | -2.81534200 | 3.68966400  |

|    |             |             |             |            |             |             |             |
|----|-------------|-------------|-------------|------------|-------------|-------------|-------------|
| H  | 0.72391500  | -2.00879800 | 3.41029000  | H          | 2.90994100  | 0.41638200  | 3.33259600  |
| H  | -2.50646400 | 2.22622400  | -2.37381900 | H          | 2.54515100  | -1.32495300 | 3.30319500  |
| H  | -1.43646900 | 4.37754900  | -2.88623400 | N          | -1.92095000 | -1.41303100 | 0.66846200  |
| H  | -1.47065900 | 6.21889500  | -1.21720100 | N          | 0.91249700  | 0.02524900  | -0.98869800 |
| H  | -2.60857700 | 5.87708700  | 0.96511800  | C          | -1.36393400 | -0.29042800 | -1.77144700 |
| H  | -3.69006300 | 3.73225000  | 1.47844500  | C          | 0.36058000  | -1.13928500 | 1.46039000  |
| H  | -6.41983900 | 0.97490900  | 1.70780400  | C          | -2.60579100 | -2.81365700 | -1.99352900 |
| H  | -6.62394300 | 0.86079600  | 4.14936000  | H          | -2.10414800 | -3.39784800 | -1.22193300 |
| H  | -4.60179400 | 0.98145500  | 5.58611000  | H          | -3.50575400 | -3.32723100 | -2.32287600 |
| H  | -2.36011900 | 1.21110200  | 4.53725400  | H          | -1.93386200 | -2.65736400 | -2.83651300 |
| H  | -2.14248600 | 1.32530100  | 2.09315000  | I          | -5.55059300 | -2.25050000 | -0.14839100 |
| C  | -0.36377600 | -0.37249200 | -0.79241400 | C          | 5.67482600  | 0.82514200  | 1.21151200  |
| C  | 1.26650400  | 0.47232900  | -2.19886300 | H          | 6.48913000  | 1.43911600  | 0.82571700  |
| C  | 0.35504500  | 0.53484500  | -3.24762600 | H          | 5.54959300  | 1.01489300  | 2.27712000  |
| C  | -0.96797600 | 0.15511300  | -3.03244300 | H          | 5.94258700  | -0.22492300 | 1.06724000  |
| H  | 2.29750100  | 0.76907200  | -2.33055500 | C          | -5.73725300 | 1.61770100  | -0.76753700 |
| H  | 0.68550700  | 0.87833900  | -4.22088700 | H          | -5.64335500 | 1.83792200  | -1.83132100 |
| H  | -1.67486700 | 0.20135600  | -3.85270500 | H          | -6.39910200 | 0.76023200  | -0.65186500 |
| Pt | 2.12837700  | -0.20861000 | 0.92043300  | H          | -6.15517500 | 2.49048700  | -0.26373500 |
| P  | 4.11973800  | 1.19536800  | 0.31008200  | C          | 2.88817800  | -2.05204200 | 0.33103100  |
| C  | 4.65859500  | 1.18780700  | -1.44846900 | H          | 3.95986800  | -2.04898800 | 0.51349100  |
| C  | 5.23466100  | 0.01628100  | -1.96375500 | H          | 2.65179100  | -2.12570300 | -0.72828300 |
| C  | 5.64588200  | -0.03184000 | -3.29310700 | H          | 2.39365600  | -2.83022100 | 0.90479500  |
| C  | 5.48392500  | 1.07861700  | -4.12143300 | I          | 6.79347200  | -3.14258600 | 0.45050300  |
| C  | 4.91692400  | 2.24512200  | -3.61261800 |            |             |             |             |
| C  | 4.50583600  | 2.30334000  | -2.28126100 | <b>IMD</b> |             |             |             |
| C  | 3.70733700  | 2.93815300  | 0.71566300  | Pt         | -2.76621400 | -1.23707500 | -0.89906300 |
| C  | 2.39524600  | 3.39278600  | 0.51893700  | P          | -4.59958800 | 0.38386400  | -0.10853300 |
| C  | 2.04781900  | 4.70753200  | 0.82146800  | C          | -0.53068300 | 0.14101500  | 0.57207700  |
| C  | 3.00551300  | 5.58197500  | 1.33160200  | C          | -1.45843300 | -1.27999500 | 2.14135000  |
| C  | 4.31137600  | 5.13856000  | 1.53464600  | C          | -0.52820800 | -0.87276900 | 3.09317300  |
| C  | 4.66330000  | 3.82580500  | 1.22812700  | C          | 0.42555500  | 0.09404500  | 2.76871200  |
| H  | 5.38965200  | -0.85633700 | -1.33556600 | C          | -4.61280800 | 2.14449500  | -0.68157800 |
| H  | 6.09804400  | -0.94001000 | -3.67715600 | C          | -4.13064900 | 2.45364200  | -1.95923800 |
| H  | 5.80444500  | 1.03604100  | -5.15695700 | C          | -4.20646700 | 3.75449100  | -2.45419300 |
| H  | 4.79723600  | 3.11616900  | -4.24823100 | C          | -4.76276200 | 4.76726500  | -1.67602500 |
| H  | 4.07129500  | 3.21916800  | -1.89777100 | C          | -5.25124200 | 4.47010200  | -0.40466100 |
| H  | 1.63848800  | 2.72517500  | 0.12163100  | C          | -5.18169600 | 3.16901600  | 0.08883500  |
| H  | 1.02869400  | 5.04310500  | 0.66227200  | C          | -4.72726300 | 0.52359400  | 1.71960100  |
| H  | 2.73540300  | 6.60465100  | 1.57222400  | C          | -5.72488900 | -0.14262400 | 2.44161600  |
| H  | 5.06070600  | 5.81443400  | 1.93251100  | C          | -5.77400400 | -0.04555900 | 3.83206600  |
| H  | 5.68440100  | 3.50365100  | 1.39258400  | C          | -4.83044000 | 0.71587000  | 4.51719600  |
| C  | -4.11141100 | -0.54588000 | -2.96384700 | C          | -3.83087900 | 1.38008500  | 3.80632100  |
| H  | -3.72817500 | -1.21347300 | -3.73547200 | C          | -3.77579200 | 1.28003800  | 2.41927900  |
| H  | -5.18368300 | -0.69921900 | -2.85921800 | H          | -2.22176600 | -2.01599800 | 2.36010400  |
| H  | -3.92377400 | 0.48701900  | -3.26097500 | H          | -0.55558500 | -1.30361800 | 4.08678800  |
| C  | 3.02437000  | -0.51211000 | 2.76390200  | H          | 1.14115400  | 0.42013600  | 3.51167100  |
| H  | 4.08102700  | -0.74881200 | 2.66133100  | H          | -3.69442700 | 1.68024000  | -2.57739500 |



|    |             |             |             |            |             |             |             |
|----|-------------|-------------|-------------|------------|-------------|-------------|-------------|
| H  | -3.82764700 | 3.97400800  | -3.44687200 | C          | 7.50674600  | 1.83621000  | -0.04262000 |
| H  | -4.81799700 | 5.78114400  | -2.05812300 | H          | 6.51579600  | 0.00221500  | 0.43451200  |
| H  | -5.69158400 | 5.25120100  | 0.20631300  | C          | 7.37687700  | 3.15638400  | -0.47012500 |
| H  | -5.57069700 | 2.95743300  | 1.07756800  | H          | 6.00471200  | 4.70343100  | -1.07742600 |
| H  | -6.46739600 | -0.74278400 | 1.93074500  | H          | 8.48680500  | 1.42267400  | 0.16976100  |
| H  | -6.55405700 | -0.56664700 | 4.37700900  | H          | 8.25753800  | 3.77856800  | -0.58994900 |
| H  | -4.87259800 | 0.79218800  | 5.59857600  | C          | 3.42445600  | -0.39099800 | -1.56307000 |
| H  | -3.09199600 | 1.97613100  | 4.33149800  | C          | 3.98829700  | 0.10048800  | -2.74712100 |
| H  | -2.99668500 | 1.80895600  | 1.88067000  | C          | 2.67983000  | -1.57797100 | -1.60357700 |
| C  | -0.53646800 | 0.60806900  | -0.80397200 | C          | 3.81729200  | -0.58795600 | -3.94674500 |
| C  | 0.54125000  | 1.91843600  | -2.37644300 | H          | 4.57850700  | 1.00957200  | -2.73547400 |
| C  | -0.32954100 | 1.46711200  | -3.36346500 | C          | 2.51718400  | -2.26557800 | -2.80379100 |
| C  | -1.33662000 | 0.55821700  | -3.03545200 | H          | 2.23180500  | -1.98122600 | -0.70230400 |
| H  | 1.33899800  | 2.61907900  | -2.59057000 | C          | 3.08413300  | -1.77221300 | -3.97819800 |
| H  | -0.21171400 | 1.82038600  | -4.38111300 | H          | 4.26863600  | -0.20162800 | -4.85453600 |
| H  | -1.99730800 | 0.19893200  | -3.81579300 | H          | 1.95066100  | -3.19032000 | -2.81789800 |
| Pt | 1.64334500  | 1.98647000  | 0.69729300  | H          | 2.95918900  | -2.31168000 | -4.91097100 |
| C  | -3.75456000 | -1.56418200 | -2.70306800 | C          | 3.99202800  | -0.77079900 | 1.26525100  |
| H  | -3.07251400 | -2.03100300 | -3.41307000 | H          | 3.10527200  | -1.37708600 | 1.45286800  |
| H  | -4.59864400 | -2.22767900 | -2.52629400 | H          | 4.80621800  | -1.42097300 | 0.93753900  |
| H  | -4.11468800 | -0.62184300 | -3.11693600 | H          | 4.28191600  | -0.29380500 | 2.20190900  |
| C  | 2.63563500  | 2.47268500  | 2.45837900  | I          | 7.62776100  | -2.82132600 | 0.98428500  |
| H  | 3.31244100  | 3.29238500  | 2.19618500  |            |             |             |             |
| H  | 1.93792100  | 2.81557700  | 3.22073100  | <b>IME</b> |             |             |             |
| H  | 3.22273400  | 1.64250800  | 2.84796000  | Pt         | -2.89155300 | -0.62003900 | -1.08704100 |
| N  | -1.45657700 | -0.77910500 | 0.90274500  | P          | -3.41255800 | 0.55571500  | 1.12430800  |
| N  | 0.43855700  | 1.48540500  | -1.11740800 | C          | 0.03041300  | -0.68553800 | -0.35512400 |
| C  | -1.47736900 | 0.11813300  | -1.71880800 | C          | -0.85778700 | -2.61546800 | 0.55848500  |
| C  | 0.42692600  | 0.61111900  | 1.47919300  | C          | 0.40155900  | -2.98406100 | 1.01499100  |
| C  | -1.38161400 | -2.70212400 | -1.52636500 | C          | 1.49510100  | -2.14860100 | 0.78430600  |
| H  | -0.70730100 | -2.90314100 | -0.69388200 | C          | -2.26130500 | 1.94244800  | 1.49341000  |
| H  | -1.93550000 | -3.60218000 | -1.78196500 | C          | -2.37256000 | 3.13733300  | 0.76594500  |
| H  | -0.81466000 | -2.35205700 | -2.38757500 | C          | -1.48932600 | 4.18874900  | 0.98917600  |
| I  | -4.22445800 | -3.32744200 | 0.40354200  | C          | -0.47068500 | 4.06059100  | 1.93425200  |
| C  | 0.18718200  | 3.39181800  | 1.25349600  | C          | -0.34433800 | 2.87517400  | 2.65304000  |
| H  | -0.70508800 | 3.28024700  | 0.63833500  | C          | -1.23328100 | 1.82170000  | 2.43588800  |
| H  | -0.07356700 | 3.32709100  | 2.30823600  | C          | -5.08662700 | 1.29241100  | 1.38216900  |
| H  | 0.65948700  | 4.35882000  | 1.05020800  | C          | -5.28240200 | 2.36780000  | 2.26094600  |
| C  | -6.26555000 | -0.17484000 | -0.66209400 | C          | -6.56255500 | 2.86481400  | 2.49345100  |
| H  | -6.30694400 | -0.10225300 | -1.74935500 | C          | -7.66346300 | 2.29308400  | 1.85671300  |
| H  | -6.42782600 | -1.21478200 | -0.38199500 | C          | -7.47842700 | 1.21990500  | 0.98800400  |
| H  | -7.04681600 | 0.45781100  | -0.23823600 | C          | -6.19812800 | 0.72254400  | 0.74871200  |
| P  | 3.59835300  | 0.52069600  | 0.02384500  | H          | -1.73788700 | -3.22622400 | 0.71763400  |
| C  | 5.10630400  | 1.54793900  | -0.15654400 | H          | 0.52432900  | -3.91943500 | 1.54911200  |
| C  | 4.98235900  | 2.87842300  | -0.58397900 | H          | 2.46068200  | -2.46142400 | 1.15703000  |
| C  | 6.38044800  | 1.03034600  | 0.11281500  | H          | -3.15922400 | 3.25445300  | 0.02839500  |
| C  | 6.11270700  | 3.67679400  | -0.74385200 | H          | -1.59467400 | 5.10811800  | 0.42290300  |
| H  | 4.00496200  | 3.30002200  | -0.80157400 | H          | 0.22001400  | 4.87924200  | 2.10608600  |

|    |             |             |             |                          |             |             |             |
|----|-------------|-------------|-------------|--------------------------|-------------|-------------|-------------|
| H  | 0.44400000  | 2.76636200  | 3.39051500  | C                        | 4.04173700  | -2.19785400 | 4.44258100  |
| H  | -1.11518500 | 0.91200100  | 3.01191400  | H                        | 5.00068600  | -2.67603500 | 2.58576900  |
| H  | -4.43726000 | 2.82402900  | 2.76328700  | C                        | 3.25177400  | -1.28706900 | 5.14004600  |
| H  | -6.69852300 | 3.69882900  | 3.17419000  | H                        | 2.18263300  | 0.58117100  | 5.03903500  |
| H  | -8.65992400 | 2.68237400  | 2.03803200  | H                        | 4.38829000  | -3.10363200 | 4.92888200  |
| H  | -8.32989400 | 0.76741000  | 0.49051700  | H                        | 2.98249300  | -1.47922500 | 6.17325200  |
| H  | -6.06809100 | -0.11865300 | 0.07969100  | C                        | 5.85467400  | 0.77408800  | 1.08843800  |
| C  | -0.22182700 | 0.48762300  | -1.17131900 | H                        | 6.52970800  | 0.29892300  | 1.80142000  |
| C  | 0.71660700  | 2.31452800  | -2.23402000 | H                        | 5.48485600  | 1.70349700  | 1.51886300  |
| C  | -0.52084800 | 2.65551300  | -2.76696000 | H                        | 6.38272400  | 1.00294600  | 0.16549200  |
| C  | -1.64171600 | 1.87865300  | -2.47780700 | I                        | 4.23233400  | 2.65055800  | -1.46180000 |
| H  | 1.60732200  | 2.89333400  | -2.43202800 | I                        | -4.60197100 | -2.82424300 | -0.36616900 |
| H  | -0.59834300 | 3.52799000  | -3.40531600 |                          |             |             |             |
| H  | -2.60267600 | 2.15080500  | -2.89733700 | <b>TS<sub>conc</sub></b> |             |             |             |
| Pt | 2.65514900  | 0.52065600  | -0.45613800 | Pt                       | -2.51969800 | -1.15618100 | -0.51696900 |
| C  | -4.40412300 | 0.30191800  | -2.18655300 | P                        | -3.01016500 | 1.12431000  | -1.23236900 |
| H  | -4.07883700 | 0.41629500  | -3.22041100 | C                        | -0.12912700 | -0.14957400 | 1.03578600  |
| H  | -5.29307100 | -0.32548900 | -2.16446300 | C                        | -1.96685300 | 0.27140600  | 2.37748400  |
| H  | -4.63831400 | 1.28050800  | -1.76700900 | C                        | -1.14067200 | 0.78938000  | 3.37162800  |
| N  | -1.03548200 | -1.47714900 | -0.12008300 | C                        | 0.23836100  | 0.84448500  | 3.15907700  |
| N  | 0.86727900  | 1.24260300  | -1.44433700 | C                        | -1.69774800 | 2.33825200  | -0.77837300 |
| C  | -1.50627700 | 0.76329200  | -1.65542700 | C                        | -0.35734300 | 1.93975200  | -0.92118900 |
| C  | 1.34026300  | -0.94253200 | 0.09195800  | C                        | 0.67874100  | 2.83039300  | -0.63939500 |
| C  | -2.43736100 | -1.63542700 | -2.87704500 | C                        | 0.38866800  | 4.12525700  | -0.19980700 |
| H  | -1.69531600 | -2.40124600 | -2.65044000 | C                        | -0.94009100 | 4.52713800  | -0.05040300 |
| H  | -3.34850300 | -2.10036300 | -3.24693600 | C                        | -1.98059500 | 3.64071400  | -0.34132700 |
| H  | -2.04285400 | -0.94441100 | -3.62143600 | C                        | -4.58746100 | 1.86428100  | -0.64667500 |
| C  | -3.25663400 | -0.56621000 | 2.57739800  | C                        | -4.90198500 | 1.78739900  | 0.72225300  |
| H  | -4.01875000 | -1.33892700 | 2.48202800  | C                        | -6.09435300 | 2.32232900  | 1.20928900  |
| H  | -2.28210900 | -1.05460700 | 2.58602400  | C                        | -6.99768600 | 2.93078600  | 0.33370500  |
| H  | -3.40549200 | -0.02247800 | 3.51155100  | C                        | -6.70041600 | 3.00486300  | -1.02790400 |
| P  | 4.42889900  | -0.33735700 | 0.74766700  | C                        | -5.50241800 | 2.47775900  | -1.51697600 |
| C  | 5.19422800  | -1.81640900 | -0.03247500 | H                        | -3.04171100 | 0.23901900  | 2.50165800  |
| C  | 6.44475800  | -2.29713300 | 0.38594200  | H                        | -1.58315800 | 1.14848800  | 4.29596200  |
| C  | 4.54332300  | -2.45699900 | -1.09501500 | H                        | 0.87466500  | 1.25528700  | 3.93765800  |
| C  | 7.01969900  | -3.40288200 | -0.23498200 | H                        | -0.12396600 | 0.92815100  | -1.24541800 |
| H  | 6.98343400  | -1.81341500 | 1.19211400  | H                        | 1.71060700  | 2.51061100  | -0.75408300 |
| C  | 5.12175900  | -3.56366000 | -1.71377500 | H                        | 1.19552500  | 4.81620700  | 0.02780500  |
| H  | 3.58927500  | -2.08102200 | -1.44540900 | H                        | -1.17115600 | 5.53196900  | 0.29210600  |
| C  | 6.35822500  | -4.03988800 | -1.28411300 | H                        | -3.00967400 | 3.96562600  | -0.22487800 |
| H  | 7.98713000  | -3.76238200 | 0.09903000  | H                        | -4.21665800 | 1.30291400  | 1.41221900  |
| H  | 4.60681600  | -4.04730000 | -2.53690800 | H                        | -6.32207400 | 2.25198300  | 2.26880300  |
| H  | 6.80926900  | -4.89921000 | -1.76891800 | H                        | -7.93089400 | 3.33886900  | 0.71109500  |
| C  | 3.94382200  | -0.79433700 | 2.47035400  | H                        | -7.39966600 | 3.47277400  | -1.71508700 |
| C  | 3.14081100  | 0.11292400  | 3.17502100  | H                        | -5.29208300 | 2.54966500  | -2.57863900 |
| C  | 4.39101200  | -1.95281700 | 3.11451500  | C                        | 0.34954800  | -0.69316700 | -0.23450200 |
| C  | 2.80276300  | -0.13003600 | 4.50355600  | C                        | 2.18058600  | -1.06981400 | -1.59637000 |
| H  | 2.76671200  | 1.00176500  | 2.67739900  | C                        | 1.35596700  | -1.57751100 | -2.59598200 |

|    |             |             |             |            |             |             |             |
|----|-------------|-------------|-------------|------------|-------------|-------------|-------------|
| C  | -0.02079600 | -1.66156000 | -2.37380400 | H          | -2.09327200 | 0.94641700  | -3.46351600 |
| H  | 3.25388800  | -1.01849200 | -1.72836300 | C          | -3.45797312 | -3.12794194 | 0.75568612  |
| H  | 1.79486600  | -1.91019700 | -3.53161500 | H          | -3.47276989 | -3.24307755 | 1.84049224  |
| H  | -0.65203100 | -2.06851400 | -3.15748500 | H          | -3.99757387 | -3.96795660 | 0.32583034  |
| Pt | 2.74564900  | 0.27213800  | 1.33098700  | H          | -2.50530157 | -3.64931422 | 0.67501637  |
| P  | 5.00140300  | -0.00597000 | 0.58011800  |            |             |             |             |
| C  | 5.29354300  | -1.66054600 | -0.19057000 | <b>TS1</b> |             |             |             |
| C  | 4.70494700  | -2.77494300 | 0.43254900  | Pt         | -2.27192800 | -0.23945400 | 1.30257700  |
| C  | 4.90823400  | -4.05982600 | -0.07203300 | P          | -4.53822800 | -1.05765300 | 0.90790100  |
| C  | 5.69041300  | -4.24771700 | -1.21505900 | C          | 0.08605100  | -0.88440000 | -0.46446500 |
| C  | 6.27062800  | -3.14602700 | -1.84670900 | C          | -1.76220700 | -1.74363200 | -1.54854600 |
| C  | 6.07685600  | -1.85888000 | -1.33739500 | C          | -0.96199600 | -2.17756300 | -2.59802400 |
| C  | 5.58046400  | 1.23812500  | -0.64833800 | C          | 0.41391100  | -1.96004700 | -2.54761900 |
| C  | 4.61633100  | 1.98241800  | -1.34823300 | C          | -4.55992600 | -2.78670600 | 0.26163800  |
| C  | 5.00159600  | 2.94353700  | -2.28518700 | C          | -3.63915000 | -3.69790700 | 0.79834200  |
| C  | 6.35612200  | 3.17950600  | -2.52902900 | C          | -3.64024200 | -5.02766200 | 0.38573500  |
| C  | 7.32478900  | 2.45197600  | -1.83262400 | C          | -4.55282000 | -5.46044500 | -0.57631200 |
| C  | 6.94104900  | 1.48821400  | -0.89834800 | C          | -5.46650700 | -4.55933800 | -1.11910500 |
| H  | 4.07484600  | -2.63163800 | 1.30717200  | C          | -5.47432800 | -3.22866100 | -0.70119400 |
| H  | 4.44748700  | -4.91130600 | 0.42095500  | C          | -5.61023800 | -0.09588600 | -0.23601900 |
| H  | 5.84162100  | -5.24703300 | -1.61366400 | C          | -5.05519900 | 0.39517400  | -1.42704500 |
| H  | 6.87496800  | -3.28450700 | -2.73911200 | C          | -5.82918200 | 1.12825900  | -2.32214800 |
| H  | 6.53304100  | -1.01267600 | -1.84157000 | C          | -7.16780000 | 1.39197700  | -2.03531000 |
| H  | 3.56235400  | 1.81302100  | -1.14520600 | C          | -7.72715100 | 0.91840900  | -0.85071700 |
| H  | 4.24366900  | 3.51184100  | -2.81704700 | C          | -6.95567700 | 0.17790300  | 0.04388000  |
| H  | 6.65691300  | 3.93083500  | -3.25391600 | H          | -2.82790000 | -1.92501100 | -1.54746100 |
| H  | 8.38022500  | 2.63550700  | -2.01354400 | H          | -1.41996100 | -2.68591400 | -3.43947900 |
| H  | 7.70973900  | 0.93581900  | -0.36665000 | H          | 1.02745200  | -2.30574900 | -3.37229100 |
| C  | -3.21921400 | -2.12965900 | -2.21248300 | H          | -2.91082400 | -3.36471700 | 1.53155300  |
| H  | -2.45131800 | -2.79134100 | -2.62089900 | H          | -2.92245800 | -5.72265300 | 0.80859800  |
| H  | -4.10013200 | -2.74512400 | -1.99933200 | H          | -4.54844700 | -6.49476300 | -0.90372100 |
| H  | -3.48872700 | -1.39276400 | -2.98080300 | H          | -6.17682400 | -4.88951300 | -1.86991000 |
| C  | 3.37342400  | 1.20939800  | 3.06683700  | H          | -6.19129000 | -2.53877300 | -1.13172000 |
| H  | 4.42864700  | 1.49576400  | 3.08051300  | H          | -4.01102500 | 0.21544700  | -1.65708400 |
| H  | 2.78292100  | 2.12235400  | 3.21459200  | H          | -5.38105200 | 1.50580400  | -3.23473200 |
| H  | 3.19472200  | 0.54804200  | 3.92624300  | H          | -7.76888600 | 1.97108100  | -2.72815000 |
| N  | -1.47218300 | -0.19354500 | 1.21911000  | H          | -8.76633300 | 1.12511300  | -0.61753000 |
| N  | 1.69046700  | -0.63110500 | -0.42607700 | H          | -7.41476800 | -0.17853200 | 0.95773600  |
| C  | -0.56988100 | -1.22376200 | -1.16194900 | C          | 0.58434100  | -0.17081300 | 0.70757000  |
| C  | 0.79759300  | 0.37528400  | 1.96064100  | C          | 2.44426300  | 0.61339800  | 1.82564100  |
| I  | -5.17583504 | -1.43468725 | 0.53956884  | C          | 1.65458200  | 1.00608800  | 2.89898600  |
| C  | 6.31994400  | 0.01127900  | 1.88180400  | C          | 0.27354700  | 0.82324600  | 2.83881800  |
| H  | 7.28181400  | -0.31028900 | 1.47386900  | H          | 3.51428400  | 0.76641600  | 1.83321700  |
| H  | 6.42413700  | 1.01339200  | 2.30520000  | H          | 2.12202300  | 1.45949100  | 3.76600700  |
| H  | 6.02720300  | -0.67827400 | 2.67853600  | H          | -0.33296600 | 1.14532900  | 3.67753900  |
| C  | -3.04122400 | 1.32409000  | -3.07041500 | Pt         | 2.94298500  | -0.76772400 | -1.06790300 |
| H  | -3.85463000 | 0.74618700  | -3.51425700 | P          | 5.15742700  | 0.06982700  | -0.74096400 |
| H  | -3.14195400 | 2.37690600  | -3.34755100 | C          | 5.24323600  | 1.69727600  | 0.12842900  |

|   |             |             |             |    |             |             |             |
|---|-------------|-------------|-------------|----|-------------|-------------|-------------|
| C | 4.39925000  | 2.71588300  | -0.33917300 | Pt | 3.02332500  | -1.34837100 | 0.36977900  |
| C | 4.41280700  | 3.97447000  | 0.25472900  | P  | 3.50701900  | 1.03484000  | 1.14566500  |
| C | 5.26001100  | 4.22940000  | 1.33383500  | C  | 0.51700300  | -0.81159000 | -1.20951200 |
| C | 6.09255000  | 3.22043400  | 1.81224700  | C  | 2.26349800  | -0.55827300 | -2.70615100 |
| C | 6.08753800  | 1.96009800  | 1.21242000  | C  | 1.35904500  | -0.31372000 | -3.73351100 |
| C | 6.32395100  | -1.03965000 | 0.14988400  | C  | -0.00905800 | -0.30388500 | -3.46078000 |
| C | 5.78948800  | -2.07164000 | 0.93237300  | C  | 2.38419700  | 1.63532300  | 2.48753500  |
| C | 6.62817000  | -2.94540900 | 1.62249300  | C  | 2.65835500  | 1.31219500  | 3.82484100  |
| C | 8.01124000  | -2.80273400 | 1.53194900  | C  | 1.79284000  | 1.70634900  | 4.84413600  |
| C | 8.55419300  | -1.78291500 | 0.75045900  | C  | 0.63856400  | 2.42671200  | 4.54577900  |
| C | 7.71736700  | -0.90596200 | 0.06412300  | C  | 0.35564400  | 2.75144400  | 3.22014300  |
| H | 3.71537800  | 2.51690700  | -1.15874600 | C  | 1.21831200  | 2.35750000  | 2.19935600  |
| H | 3.75491000  | 4.75246700  | -0.11813700 | C  | 3.51610700  | 2.40186100  | -0.09003200 |
| H | 5.26568400  | 5.20831500  | 1.80163800  | C  | 4.55276200  | 3.34496400  | -0.13723800 |
| H | 6.74955100  | 3.41014200  | 2.65484400  | C  | 4.53240800  | 4.37300300  | -1.07770300 |
| H | 6.74009500  | 1.18515200  | 1.59753500  | C  | 3.47664900  | 4.47972400  | -1.98023700 |
| H | 4.71278500  | -2.19493400 | 0.98616500  | C  | 2.44130600  | 3.54834900  | -1.94248400 |
| H | 6.20005900  | -3.74107600 | 2.22311200  | C  | 2.46414600  | 2.51335600  | -1.01025600 |
| H | 8.66514400  | -3.48585200 | 2.06396800  | H  | 3.33487300  | -0.56563200 | -2.86282400 |
| H | 9.63056100  | -1.66998900 | 0.67333500  | H  | 1.72919300  | -0.12919300 | -4.73571300 |
| H | 8.16034000  | -0.11906300 | -0.53595300 | H  | -0.69904300 | -0.10874000 | -4.27364500 |
| C | -2.95297200 | 0.67500500  | 3.03825600  | H  | 3.55479800  | 0.76459800  | 4.09006100  |
| H | -2.30227800 | 1.50311100  | 3.31998400  | H  | 2.02885100  | 1.45341500  | 5.87266300  |
| H | -3.96157500 | 1.07940700  | 2.93093400  | H  | -0.03201300 | 2.73792700  | 5.33986000  |
| H | -2.96025700 | -0.05103400 | 3.85868200  | H  | -0.53342000 | 3.32125800  | 2.97121800  |
| C | 3.62767600  | -1.74789200 | -2.76223500 | H  | 0.97852700  | 2.63915300  | 1.18106000  |
| H | 4.66593800  | -2.08194800 | -2.67906100 | H  | 5.38496700  | 3.29080300  | 0.55318000  |
| H | 3.02489400  | -2.63830700 | -2.95476500 | H  | 5.34462100  | 5.09201100  | -1.10053400 |
| H | 3.55654300  | -1.09598800 | -3.64123000 | H  | 3.46139400  | 5.28257300  | -2.70968900 |
| N | -1.25059700 | -1.09954900 | -0.49047900 | H  | 1.61507300  | 3.62231800  | -2.64107100 |
| N | 1.92212000  | 0.03548000  | 0.73544100  | H  | 1.65621700  | 1.79246300  | -1.00553500 |
| C | -0.30971500 | 0.22756900  | 1.71710000  | C  | 0.14218100  | -1.13632900 | 0.16223500  |
| C | 0.99476000  | -1.30640800 | -1.45378600 | C  | -1.57887000 | -1.46649500 | 1.66554900  |
| C | -2.42345000 | 2.02719600  | 0.26518400  | C  | -0.66998100 | -1.73694800 | 2.68141800  |
| H | -1.89534100 | 1.67433600  | -0.60206800 | C  | 0.69650400  | -1.71650600 | 2.40624500  |
| H | -3.49663200 | 1.99237600  | 0.29465100  | H  | -2.64366000 | -1.50483100 | 1.84727100  |
| H | -1.88079000 | 2.49049500  | 1.06679300  | H  | -1.03492800 | -1.97208700 | 3.67453600  |
| I | -2.60569100 | 4.45474800  | -0.92615400 | H  | 1.40229600  | -1.94580000 | 3.19470400  |
| C | 6.03102700  | 0.48131900  | -2.31577500 | Pt | -2.39057700 | -0.68170100 | -1.41354600 |
| H | 6.97553500  | 0.99294600  | -2.12907700 | P  | -4.64114900 | -1.15387300 | -0.57809900 |
| H | 6.21713500  | -0.42334100 | -2.89291200 | C  | -4.69485200 | -2.62373000 | 0.53704000  |
| H | 5.38903500  | 1.13962600  | -2.90223500 | C  | -3.88779100 | -3.72318300 | 0.21175000  |
| C | -5.53663200 | -1.25108200 | 2.44582600  | C  | -3.92872300 | -4.88119800 | 0.98370600  |
| H | -5.77352900 | -0.28304000 | 2.88544900  | C  | -4.76754400 | -4.94991100 | 2.09593000  |
| H | -6.45844400 | -1.79915100 | 2.24882600  | C  | -5.56844800 | -3.85921400 | 2.42868300  |
| H | -4.94386900 | -1.81864100 | 3.16377700  | C  | -5.53744800 | -2.70144800 | 1.65183500  |
|   |             |             |             | C  | -5.52229600 | 0.17777000  | 0.33350800  |
|   |             |             |             | C  | -4.84642900 | 0.85752200  | 1.35777600  |

TS2

|            |             |             |             |    |             |             |             |
|------------|-------------|-------------|-------------|----|-------------|-------------|-------------|
| C          | -5.47762000 | 1.87061300  | 2.07338400  | C  | 0.39731100  | -0.03310500 | 0.01181700  |
| C          | -6.78993100 | 2.22943600  | 1.76735300  | C  | -0.52988900 | -0.97755000 | 1.95089100  |
| C          | -7.46661200 | 1.56926900  | 0.74467000  | C  | 0.57121700  | -0.61439900 | 2.71210400  |
| C          | -6.83931300 | 0.54789300  | 0.03218700  | C  | 1.59293800  | 0.10126000  | 2.10018600  |
| H          | -3.21750900 | -3.67000700 | -0.64073300 | C  | -3.32763700 | 2.54999300  | -0.87969400 |
| H          | -3.29981500 | -5.72530300 | 0.72130900  | C  | -3.00517700 | 2.52420600  | -2.24197900 |
| H          | -4.79417800 | -5.84930500 | 2.70201500  | C  | -2.88609200 | 3.70823900  | -2.96818000 |
| H          | -6.22163600 | -3.90703600 | 3.29368800  | C  | -3.08344000 | 4.93628200  | -2.34063600 |
| H          | -6.16835500 | -1.86157600 | 1.91932000  | C  | -3.40898200 | 4.97366500  | -0.98542300 |
| H          | -3.81994900 | 0.60301400  | 1.59762300  | C  | -3.53533900 | 3.79083000  | -0.25997100 |
| H          | -4.93947700 | 2.38753700  | 2.86039800  | C  | -3.40651400 | 1.42011100  | 1.78464700  |
| H          | -7.27894400 | 3.02495000  | 2.31929700  | C  | -4.41553400 | 1.19005000  | 2.72766300  |
| H          | -8.48581800 | 1.84646200  | 0.49723300  | C  | -4.22618800 | 1.53718000  | 4.06502500  |
| H          | -7.38799500 | 0.04761600  | -0.75621600 | C  | -3.02924100 | 2.11673100  | 4.47843100  |
| C          | 3.86703200  | -2.06581800 | 2.14038400  | C  | -2.01555200 | 2.34378400  | 3.54782900  |
| H          | 3.49675100  | -3.07256500 | 2.33422500  | C  | -2.20082500 | 1.99265200  | 2.21383500  |
| H          | 4.95015300  | -2.09845000 | 2.03459100  | H  | -1.37522900 | -1.50757800 | 2.37061600  |
| H          | 3.60109800  | -1.42796500 | 2.98432500  | H  | 0.61978400  | -0.87403900 | 3.76261000  |
| C          | -3.23327400 | -0.14664300 | -3.23104100 | H  | 2.45379500  | 0.40178900  | 2.68489600  |
| H          | -4.18527100 | 0.37433500  | -3.11092000 | H  | -2.84488500 | 1.57932500  | -2.74375600 |
| H          | -2.56903700 | 0.51869800  | -3.78267400 | H  | -2.63649500 | 3.66787200  | -4.02330500 |
| H          | -3.40455100 | -1.04381100 | -3.83521600 | H  | -2.98828800 | 5.85856200  | -2.90404700 |
| N          | 1.84440200  | -0.80170000 | -1.46058500 | H  | -3.57199100 | 5.92538100  | -0.49036600 |
| N          | -1.18522100 | -1.17243700 | 0.41990900  | H  | -3.79861400 | 3.83912400  | 0.78985500  |
| C          | 1.13138400  | -1.40708400 | 1.11999400  | H  | -5.35373400 | 0.73839800  | 2.43176500  |
| C          | -0.47892700 | -0.54877500 | -2.16571600 | H  | -5.01940400 | 1.35374400  | 4.78196700  |
| C          | 2.76408700  | -3.37566800 | -0.15776500 | H  | -2.88602800 | 2.38997800  | 5.51851000  |
| H          | 2.40670200  | -3.41910000 | -1.18675900 | H  | -1.07924400 | 2.79417500  | 3.86047700  |
| H          | 3.72960400  | -3.87063600 | -0.07992500 | H  | -1.40482600 | 2.17967600  | 1.50119300  |
| H          | 2.04435000  | -3.85470000 | 0.50574200  | C  | 0.19070200  | 0.09351800  | -1.44770300 |
| I          | 5.56825200  | -1.36342800 | -0.98268900 | C  | 1.03394200  | 0.65929900  | -3.51593300 |
| C          | -2.26619600 | 1.75594500  | -0.93193000 | C  | -0.11060800 | 0.19979000  | -4.16184900 |
| H          | -1.63276000 | 1.55836700  | -0.08684600 | C  | -1.14108000 | -0.32926000 | -3.39015600 |
| H          | -1.82591800 | 1.99171400  | -1.88250600 | H  | 1.86166700  | 1.08118500  | -4.07947200 |
| H          | -3.33201200 | 1.80302600  | -0.80987200 | H  | -0.18942700 | 0.24887100  | -5.24238100 |
| I          | -2.17247200 | 4.38230100  | -0.27705000 | H  | -2.03103000 | -0.70657400 | -3.87890800 |
| C          | 5.16685400  | 1.12221000  | 1.93245700  | Pt | 2.92245800  | 1.59599100  | -0.04396200 |
| H          | 5.27774300  | 0.30071900  | 2.63798500  | P  | 4.32366100  | -0.24710900 | -0.54522400 |
| H          | 5.92675900  | 0.99399900  | 1.16311900  | C  | 5.75941600  | -0.40876100 | 0.58768000  |
| H          | 5.31597700  | 2.06476700  | 2.45980300  | C  | 5.97033700  | 0.50731500  | 1.62289800  |
| C          | -5.80572100 | -1.67833200 | -1.90644100 | C  | 7.09170500  | 0.39491600  | 2.44423300  |
| H          | -6.74405800 | -2.04027200 | -1.48509900 | C  | 8.00838200  | -0.63243600 | 2.23750000  |
| H          | -6.00508000 | -0.86297100 | -2.60050400 | C  | 7.80352000  | -1.55153000 | 1.20744700  |
| H          | -5.33660500 | -2.49207500 | -2.46032300 | C  | 6.68593300  | -1.44333000 | 0.38604300  |
| <b>TS3</b> |             |             |             | C  | 3.59753700  | -1.92285100 | -0.63819600 |
| Pt         | -2.34473700 | -1.17372100 | -0.68498800 | C  | 3.18251700  | -2.46425100 | -1.86105600 |
| P          | -3.60428200 | 0.95233200  | 0.01654100  | C  | 2.61790900  | -3.73754500 | -1.90680700 |
|            |             |             |             | C  | 2.45559100  | -4.47538300 | -0.73631200 |

|            |             |             |             |    |             |             |             |
|------------|-------------|-------------|-------------|----|-------------|-------------|-------------|
| C          | 2.86134400  | -3.93855600 | 0.48523600  | C  | 1.02032600  | -3.21777100 | -1.20113600 |
| C          | 3.42975700  | -2.66928000 | 0.53665400  | C  | 1.90863200  | -2.23347100 | -0.77211500 |
| H          | 5.25953500  | 1.30742400  | 1.79241000  | C  | -5.66560300 | -0.46457400 | 1.27430800  |
| H          | 7.24439600  | 1.10957400  | 3.24567600  | C  | -4.74614300 | -0.49854300 | 2.33211300  |
| H          | 8.87966300  | -0.72060500 | 2.87741500  | C  | -5.19073200 | -0.59535600 | 3.64839800  |
| H          | 8.51343600  | -2.35517400 | 1.04487600  | C  | -6.55466200 | -0.66684700 | 3.92371400  |
| H          | 6.53439800  | -2.17201500 | -0.40295100 | C  | -7.47576000 | -0.64397300 | 2.87787800  |
| H          | 3.29746100  | -1.90691600 | -2.78262900 | C  | -7.03748600 | -0.54378300 | 1.55991100  |
| H          | 2.30618900  | -4.15109800 | -2.85962700 | C  | -5.29066700 | 1.41512000  | -1.00198200 |
| H          | 2.01594900  | -5.46601600 | -0.77492600 | C  | -6.13817600 | 2.29983000  | -0.32501200 |
| H          | 2.73940600  | -4.50940800 | 1.39925300  | C  | -6.33705100 | 3.58935100  | -0.81634500 |
| H          | 3.75269900  | -2.26937000 | 1.49117900  | C  | -5.69788900 | 4.00177700  | -1.98338800 |
| C          | -3.79323200 | -1.57986100 | -2.13369200 | C  | -4.85247300 | 3.12348100  | -2.66087800 |
| H          | -3.44662700 | -2.38221600 | -2.78451900 | C  | -4.64496600 | 1.83697200  | -2.17205900 |
| H          | -4.71483700 | -1.89121800 | -1.64616000 | H  | -1.05193800 | -3.73179900 | -1.48527400 |
| H          | -3.98784000 | -0.69174000 | -2.73656700 | H  | 1.38182900  | -4.17826700 | -1.54895900 |
| C          | 2.76257700  | 3.32620300  | 1.45515600  | H  | 2.96668900  | -2.45400000 | -0.80082200 |
| H          | 3.70457600  | 3.79870100  | 1.18247300  | H  | -3.68273900 | -0.46240600 | 2.12878400  |
| H          | 2.05859100  | 4.07501300  | 1.79623800  | H  | -4.46849700 | -0.62152500 | 4.45695000  |
| H          | 2.88395500  | 2.59041700  | 2.24575000  | H  | -6.89927600 | -0.74601200 | 4.94902700  |
| N          | -0.60549200 | -0.69180500 | 0.65081600  | H  | -8.53846100 | -0.70643300 | 3.08471400  |
| N          | 1.18569300  | 0.59765900  | -2.19415500 | H  | -7.77450200 | -0.53241500 | 0.76609800  |
| C          | -1.02124800 | -0.37412700 | -2.00140700 | H  | -6.63674400 | 1.99585400  | 0.58794000  |
| C          | 1.51136700  | 0.42483300  | 0.74437600  | H  | -6.99084000 | 4.27041100  | -0.28251700 |
| C          | -1.47096000 | -3.02032900 | -1.20317300 | H  | -5.85301500 | 5.00628800  | -2.36177800 |
| H          | -1.16144700 | -3.01850300 | -2.24736700 | H  | -4.34652700 | 3.44199900  | -3.56569900 |
| H          | -0.60381400 | -3.17931600 | -0.56224000 | H  | -3.96461400 | 1.17142600  | -2.69216700 |
| H          | -2.21029900 | -3.79909700 | -1.03240200 | C  | -0.56138900 | 0.40235700  | 0.05507300  |
| I          | -3.91319100 | -2.57155300 | 1.30638000  | C  | -0.16515900 | 2.51521300  | 0.89965500  |
| C          | 1.51424000  | 3.37706900  | -0.18168900 | C  | -1.53200400 | 2.74594400  | 0.97465300  |
| H          | 1.35383500  | 2.89153900  | -1.15018300 | C  | -2.42786700 | 1.76597800  | 0.54965700  |
| H          | 0.59544300  | 3.35148700  | 0.39068100  | H  | 0.56249700  | 3.25601100  | 1.19998800  |
| H          | 1.86359400  | 4.38841000  | -0.35944000 | H  | -1.88882100 | 3.69356700  | 1.36048100  |
| C          | -5.41943100 | 0.73999900  | -0.21178800 | H  | -3.48591100 | 1.97935500  | 0.61400700  |
| H          | -5.62056100 | 0.63826000  | -1.27856500 | Pt | 2.37887500  | 0.68597100  | 0.34979200  |
| H          | -5.75704300 | -0.16620500 | 0.28904000  | C  | -3.49217600 | -2.58591800 | -2.35590700 |
| H          | -5.96365300 | 1.60641600  | 0.16670800  | H  | -2.64201600 | -3.16279800 | -2.69627600 |
| C          | 5.07352700  | 0.08148500  | -2.18999200 | H  | -4.41553800 | -3.12934700 | -2.51332500 |
| H          | 4.29492900  | 0.19826700  | -2.94296000 | H  | -3.54210700 | -1.64734000 | -2.91619100 |
| H          | 5.63915900  | 1.01238700  | -2.12941400 | N  | -0.83148700 | -1.79179400 | -0.77929200 |
| H          | 5.74886400  | -0.72411600 | -2.48196100 | N  | 0.31771700  | 1.35047200  | 0.44643700  |
| I          | 7.37231719  | 4.19469091  | 2.82740722  | C  | -1.95773200 | 0.54740200  | 0.05253800  |
| <b>TS4</b> |             |             |             | C  | 1.43614500  | -1.00109600 | -0.30386400 |
| Pt         | -2.88956200 | -1.15124000 | -0.68043300 | C  | -6.31171600 | -1.19772500 | -1.47809900 |
| P          | -5.06277200 | -0.32277700 | -0.45048800 | H  | -6.01425900 | -1.14762700 | -2.52498500 |
| C          | 0.03980100  | -0.84557900 | -0.36315500 | H  | -6.41969700 | -2.24008000 | -1.18074900 |
| C          | -0.34533600 | -2.97473300 | -1.17932800 | H  | -7.27735600 | -0.70145300 | -1.38322700 |
|            |             |             |             | P  | 4.50714200  | -0.20370700 | 0.44098300  |

|   |             |             |             |
|---|-------------|-------------|-------------|
| C | 5.38156000  | -0.19667700 | -1.17096000 |
| C | 6.78132300  | -0.24504100 | -1.24514800 |
| C | 4.63859400  | -0.12906500 | -2.35695800 |
| C | 7.42081000  | -0.23602900 | -2.48245300 |
| H | 7.38331900  | -0.28416800 | -0.34513700 |
| C | 5.28201400  | -0.12448400 | -3.59256500 |
| H | 3.55746700  | -0.06371000 | -2.31207400 |
| C | 6.67287900  | -0.17877200 | -3.65746900 |
| H | 8.50407200  | -0.26937900 | -2.52612900 |
| H | 4.69534100  | -0.06784700 | -4.50313800 |
| H | 7.17352200  | -0.16864100 | -4.61974500 |
| C | 4.54648600  | -1.93482600 | 1.07807900  |
| C | 3.75926900  | -2.23980100 | 2.19695600  |
| C | 5.37931200  | -2.92068700 | 0.53806600  |
| C | 3.81016300  | -3.50839700 | 2.76759100  |
| H | 3.09417500  | -1.48939700 | 2.61211200  |
| C | 5.42155600  | -4.19309800 | 1.10842100  |
| H | 5.99152400  | -2.70742100 | -0.33041500 |
| C | 4.64062200  | -4.48838100 | 2.22336800  |
| H | 3.19734000  | -3.73300600 | 3.63417200  |
| H | 6.06690300  | -4.95160600 | 0.67819700  |
| H | 4.67625200  | -5.47818600 | 2.66592400  |
| C | 5.65823800  | 0.60450300  | 1.62616200  |
| H | 6.54611400  | -0.01470400 | 1.76027700  |
| H | 5.15389600  | 0.70490100  | 2.58682800  |
| H | 5.93498100  | 1.59498800  | 1.27368000  |
| I | 3.38285300  | 3.27352600  | 0.87122200  |
| C | -3.61657700 | -3.30117000 | -0.41582100 |
| H | -3.16960800 | -3.13986600 | 0.56963200  |
| H | -3.19581400 | -4.20732300 | -0.83642700 |
| H | -4.69146600 | -3.39023200 | -0.32740700 |
| I | -2.61547816 | -2.08945787 | 3.43098374  |
